# 1 Retinal microvascular and neuronal pathologies probed *in vivo* by adaptive 2 optical two-photon fluorescence microscopy

3 Qinrong Zhang<sup>1,2\*</sup>, Yuhan Yang<sup>1\*</sup>, Kevin J. Cao<sup>2,3</sup>, Wei Chen<sup>1,2</sup>, Santosh Paidi<sup>5</sup>, Chun-Hong Xia<sup>5,6</sup>, Richard H. Kramer<sup>2,3,6</sup>, Xiaohua  
4 Gong<sup>5,6</sup>, Na Ji<sup>1,2,3,4,6,7</sup>

5 <sup>1</sup>Department of Physics, University of California, Berkeley, CA 94720, USA

6 <sup>2</sup>Department of Molecular and Cell Biology, University of California, Berkeley, CA 94720, USA

7 <sup>3</sup>Helen Wills Neuroscience Institute, University of California, Berkeley, CA 94720, USA

8 <sup>4</sup>Molecular Biophysics and Integrated Bioimaging Division, Lawrence Berkeley National Laboratory,  
9 Berkeley, CA 94720, USA

10 <sup>5</sup>School of Optometry, University of California, Berkeley, CA 94720, USA

11 <sup>6</sup>Vision Science Program, University of California, Berkeley, CA 94720, USA

12 \*Contributed equally

13 <sup>7</sup>Corresponding author: [jina@berkeley.edu](mailto:jina@berkeley.edu)

## 15 Abstract

16 The retina, behind the transparent optics of the eye, is the only neural tissue whose physiology and pathology  
17 can be non-invasively probed by optical microscopy. The aberrations intrinsic to the mouse eye, however,  
18 prevent high-resolution investigation of retinal structure and function *in vivo*. Optimizing the design of a two-  
19 photon fluorescence microscope (2PFM) and sample preparation procedure, we found that adaptive optics  
20 (AO), by measuring and correcting ocular aberrations, is essential for resolving synapses and achieving three-  
21 dimensional cellular resolution in the mouse retina *in vivo*. Applying AO-2PFM to longitudinal retinal  
22 imaging in transgenic models of retinal pathology, we characterized microvascular lesions and observed  
23 microglial migration in a proliferative vascular retinopathy model, and found Lidocaine to effectively  
24 suppress retinal ganglion cell hyperactivity in a retinal degeneration model. Tracking structural and  
25 functional changes at high resolution longitudinally, AO-2PFM enables microscopic investigations of retinal  
26 pathology and pharmacology for disease diagnosis and treatment *in vivo*.

## 28 Introduction

29 Retina is a layered tissue in the back of the eye that transduces light into electrochemical signals to be further  
30 processed by the brain for visual perception and cognition<sup>1</sup>. As one of the most energy-demanding tissues,

31 the retina is metabolically sustained by an intricate vasculature with several laminar plexuses<sup>2</sup>. Vascular and  
32 neuronal abnormalities in the retina are associated with both ocular<sup>3</sup> and systemic diseases<sup>4-6</sup>, underscoring  
33 the importance of studying retinal pathology and pharmacology.

34 With well-developed genetics and similar physiology to the human retina, mouse models have been widely  
35 utilized for mechanistical studies of retinal diseases. Behind highly transparent mouse eye optics (i.e., cornea  
36 and crystalline lens), the retina is uniquely accessible to light and the only part of the nervous system that can  
37 be probed non-invasively by optical imaging. Recent advances in mouse genetics have enabled fluorescence  
38 microscopy investigations of vasculature<sup>7</sup> as well as neurons and glial cells<sup>8-10</sup> of the mouse retina. Among  
39 fluorescence microscopy techniques, two-photon fluorescence microscopy (2PFM)<sup>11</sup> utilizing near-infrared  
40 (NIR) excitation is particularly suited for retinal imaging. Its intrinsic optical sectioning capability permits  
41 depth-resolved three-dimensional (3D) imaging throughout the retina. With the retinal photoreceptors  
42 minimally responsive to NIR light, 2PFM is also an ideal tool for functional studies of retina<sup>12,13</sup>. However,  
43 as a far-from-perfect imaging system, the optics of the mouse eye introduce severe aberrations to the NIR  
44 excitation light, preventing high-resolution visualization of subcellular features *in vivo*. As a result, the vast  
45 majority of microscopy studies have been carried out *ex vivo* on dissected retinas, preventing longitudinal  
46 investigations of retinal pathology under physiological conditions.

47 Adaptive optics (AO) is a collection of technologies that actively measure and correct for optical  
48 aberrations<sup>14</sup>, and has been applied to optical microscopy for high-resolution imaging of neural tissues<sup>15,16</sup>.  
49 It has also been combined with ophthalmological imaging modalities to restore diffraction-limited imaging  
50 performance for the human retina<sup>17,18</sup>. Because of the severe aberrations of the mouse eye, AO has also been  
51 applied to *in vivo* imaging of the mouse retina<sup>19-26</sup>. However, there are disagreements in the reported spatial  
52 resolutions<sup>19-26</sup>, characteristics and magnitude of aberration<sup>19-21,24-26</sup>, and the effectiveness of AO<sup>20,21,24-26</sup>.  
53 For example, whereas previous papers reported cellular resolution without AO, a recent AO-2PFM study<sup>26</sup>  
54 reported extremely large aberrations in the mouse eye and found AO to be required in order to resolve  
55 microvasculature and cell bodies in 2D *in vivo*. These discrepancies have led to uncertainty over the imaging

56 performance achievable with conventional 2PFM and the necessity of AO for microvascular and cellular  
57 investigations of retinal physiology. Together with a lack of detailed imaging protocols, they have prevented  
58 the routine application of AO-2PFM to disease diagnosis and therapeutic intervention in the retina of mouse  
59 models of ocular, cerebral, and systemic diseases.

60 The aims of this work are to provide a resource for *in vivo* retinal imaging using 2PFM, by optimizing the  
61 design of a 2PFM for *in vivo* imaging of the mouse retina, characterizing mouse ocular aberration, developing  
62 a guideline for adaptive optical 2PFM (AO-2PFM) imaging, and demonstrating its applications to retinal  
63 pathology and pharmacology. Using a carefully engineered 2PFM and following an optimized sample  
64 preparation procedure, we were able to achieve two-dimensional (2D) cellular resolution imaging  
65 performance in the mouse retina without AO. For synaptic, subcellular, and three-dimensional (3D) cellular  
66 resolution imaging of the mouse retina, AO was essential in improving image brightness, contrast, and  
67 resolution. Testing the performance of AO-2PFM in various transgenic mouse lines, we proposed strategies  
68 to maximize its impact on image quality improvement. We extended the application of AO-2PFM to mouse  
69 retinal pathology and pharmacology by imaging the retinas of two transgenic models with proliferative  
70 vascular retinopathy and retinal degeneration, respectively. In our model of proliferative vascular retinopathy,  
71 AO enabled us to, for the first time, characterize retinal vascular lesions with sub-capillary details over  
72 multiple days and track microglial migration *in vivo*. In our model of retinal degeneration, AO allowed high-  
73 fidelity interrogation of pharmacologically modified hyperactivity of retinal ganglion cells (RGCs),  
74 indicating AO-2PFM as a promising tool evaluating retinal pharmacology *in vivo*. Together, by  
75 systematically optimizing and applying AO-2PFM to *in vivo* mouse retinal imaging, our work represents an  
76 important advancement in enabling high-resolution longitudinal studies of retinal pathology and  
77 pharmacology for disease diagnosis and treatment.

78

## 79 **Results**

### 80 **Optimized AO-2PFM for *in vivo* mouse retinal imaging**

81 A home-built 2-photon fluorescence microscope equipped with a segmented deformable mirror (DM) and a  
82 Shack-Hartmann (SH) sensor<sup>27</sup> was modified for *in vivo* mouse retinal imaging by replacing the objective  
83 lens with an add-on eye imaging module<sup>26,28</sup> (**Fig. 1A, Materials and Methods**). The module consisted of  
84 an electrically tunable lens (ETL) whose adaptive surface was conjugated to the DM, a turning mirror, and  
85 two lens groups (L7 and L8) that relayed the adaptive surface of the ETL to the pupil of the mouse eye. With  
86 this design, the optics of the mouse eye focused 920 nm light onto the retina to excite fluorescent markers  
87 and collected the emitted fluorescence for detection. The ETL allowed us to adjust the focal plane in the  
88 mouse eye without translating the mouse<sup>29</sup> or optics<sup>30</sup> in the imaging system. For all experiments, system  
89 aberrations in the 2-photon illumination path were measured with a modal AO method and corrected before  
90 image acquisition (**Materials and Methods**; “No AO” images: system aberration correction only).

91 To ensure optimal performance, we thoroughly characterized our AO-2PFM. We investigated how ETL  
92 current and mouse eye placement (with a longitudinal displacement of up to 4 mm in typical experiments)  
93 impacted imaging performance (**Fig. S1**). We found that aberrations introduced by the ETL at different  
94 control currents minimally affected image quality and that axial focal shift varied linearly with ETL current  
95 while field-of-view (FOV) size remained mostly constant. We also optimized sample preparation procedure.  
96 We discovered that a custom-designed 0-diopter contact lens (CL; design parameters in **Fig. S2A**) in  
97 combination with a single application of eye gel between the CL and the cornea reduced aberrations,  
98 prevented cataract formation, and improved wavefront sensing and imaging for hours (**Fig. S2**).

99 In order to achieve diffraction-limited imaging of the mouse retina *in vivo*, we measured and corrected  
100 ocular aberrations with a direct wavefront sensing method<sup>31,32</sup>, utilizing the SH sensor for wavefront  
101 measurement and the DM for wavefront correction (**Fig. 1A**). Briefly, a 3D-localized fluorescence ‘guide  
102 star’ was formed in the retina via 2-photon excitation and scanned over a user-defined 2D area with  
103 galvanometer scanning mirrors. The emitted fluorescence was collected and, after being descanned by the  
104 same pair of scanning mirrors, directed to the SH sensor. The now stationary fluorescence wavefront was  
105 segmented by a lenslet array and focused onto a camera, forming an SH image composed of an array of foci

106 (Fig. 1A, inset 1). Local phase slopes of wavefront segments were calculated from the displacements of the  
 107 foci from those taken without aberrations. Assuming spatially continuous aberrations, we computationally  
 108 reconstructed the wavefront from the phase slopes<sup>33</sup>. We then applied a corrective wavefront, opposite to the  
 109 measured aberrations, to the DM by controlling the tip, tilt, and piston of each segment (Fig. 1A, inset 2) so  
 110 that mouse ocular aberrations could be canceled out, ensuring diffraction-limited focusing of the 2-photon  
 111 excitation light on the mouse retina.

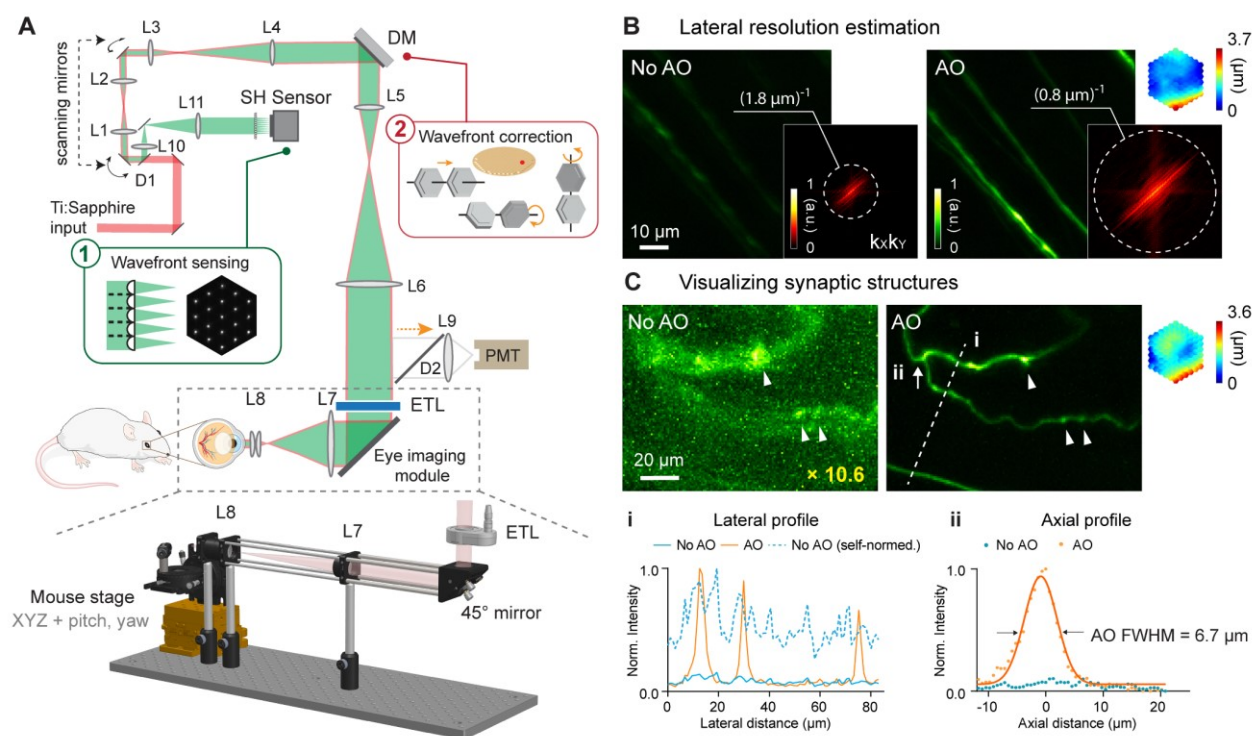

**Figure 1. AO-2PFM for diffraction-limited imaging of the mouse retina *in vivo*.** (A) Schematics of AO-2PFM. Inset 1: direct wavefront measurement by a Shack-Hartmann (SH) sensor composed of a lenslet array and a camera. Inset 2: wavefront correction with a deformable mirror composed of 163 segments with piston, tip, and tilt controls. Grey dashed box: eye imaging module. Bottom: 3D assembly of eye imaging module. L, lens; D, dichroic mirror; DM, deformable mirror; PMT, photomultiplier tube; ETL, electrically tunable lens. (B) Maximum intensity projections (MIPs) of image stacks ( $72 \times 72 \times 25 \mu\text{m}^3$ ) of RGC axons measured without and with AO, respectively, normalized to AO image. Insets:  $k_x k_y$  spatial frequency representation of the images and corrective wavefront. (C) MIPs of image stacks ( $132 \times 97 \times 32 \mu\text{m}^3$ ) of fine RGC processes measured without and with AO, respectively, normalized to AO image. ‘No AO’ image brightness artificially increased by 10.6 $\times$  for better visualization. White arrowheads: synaptic structures. Inset: corrective wavefront. Bottom: i: lateral signal profiles along white dashed line; ii: axial signal profiles of process ii (white arrow). Representative data from > 3 experiments (technical replicates).

112 All *in vivo* imaging experiments were conducted in anesthetized mice with dilated pupil (**Materials and**  
 113 **Methods**). In most experiments, an area of  $19 \times 19 \mu\text{m}^2$  of the retina was scanned for 3-10 seconds for  
 114 wavefront sensing. To estimate the spatial resolution of our AO-2PFM for *in vivo* mouse retinal imaging, we

115 imaged Thy1-GFP line M transgenic mice that had green fluorescent protein (GFP) expressed in a subset of  
116 RGCs<sup>34</sup>. The image taken without AO showed dim and distorted RGC axons; after aberration correction, we  
117 achieved an 8.6× increase in signal and proper visualization of the fine RGC axons (**Fig. 1B**). The spatial  
118 frequency space representations of the images indicated that AO enhanced the ability of the imaging system  
119 to acquire higher resolution information and led to a lateral resolution that was better than ~0.8 μm (**Fig. 1B**,  
120 insets). For some thin RGC processes (**Fig. 1C**), restoring diffraction-limited resolution led to an increase in  
121 signal (by 10.6×) and contrast (**Fig. 1C, i**), and, for the first time, enabled *in vivo* 2PFM visualization of  
122 synaptic structures in the mouse retina (**Fig. 1C**, white arrows). From the axial profile of a thin process (**Fig.**  
123 **1C, ii**), we estimated the axial resolution after AO correction to be 6.7 μm. Both the lateral and axial  
124 resolution estimations were close to the theoretical diffraction-limited resolution for a fully-dilated mouse  
125 eye with 0.49 numerical aperture<sup>35</sup>.

### 126 **AO improves *in vivo* imaging of retinal vasculature**

127 Retinal vasculature supports the physiological functions of the retina. Retinal vascular diseases can lead to  
128 vision loss. Abnormalities in retinal vasculature morphology and physiology serve as important biomarkers  
129 for various cerebral and systemic diseases<sup>36–39</sup>. Therefore, *in vivo* characterization of retinal vasculature,  
130 especially at the microvasculature level, is of great physiological and clinical importance. Utilizing either  
131 confocal microscopy<sup>20,25</sup> or 2PFM<sup>26,40,41</sup>, previous publications have achieved *in vivo* visualization of retinal  
132 microvasculature through either full correction of the mouse eye aberrations<sup>20,25,26</sup>, partial correction of the  
133 anterior optics of the mouse eye<sup>41</sup>, or stringent selection of imaging lenses<sup>40</sup>. These prior demonstration-of-  
134 principle experiments suggest that in order to image retinal microvasculature *in vivo*, mouse eye aberrations  
135 need to be corrected, either fully or partially. With our optimized imaging system, we aimed to determine  
136 whether aberration correction was indeed essential for visualizing microvasculature. Furthermore, we  
137 proceeded to systematically characterize the spatial dependence of mouse eye aberrations and how large a  
138 FOV can benefit from a single AO correction.



139 To verify the necessity of AO in resolving mouse retinal microvasculature and characterize mouse eye  
 140 induced aberrations, we performed *in vivo* 2PFM angiography by retro-orbitally injecting dextran-conjugated  
 141 fluorescein isothiocyanate (FITC) into the non-imaged eye. Aberrations were measured with fluorescence  
 142 emitted from vessels in the superficial plexus (red asterisk, **Fig. 2A**; wavefront sensing area:  $19 \times 19 \mu\text{m}^2$ ).  
 143 After AO correction, we observed a 2-10 $\times$  enhancement in signal (**Fig. 2B,C**). Comparing the line signal  
 144 profiles (along the orange dashed lines, **Fig. 2A,B**), we found that AO improved signal for all vessels while  
 145 its impact on signal of smaller capillaries (**Fig. 2C**, black asterisks; 6-10 $\times$  improvement) was more substantial

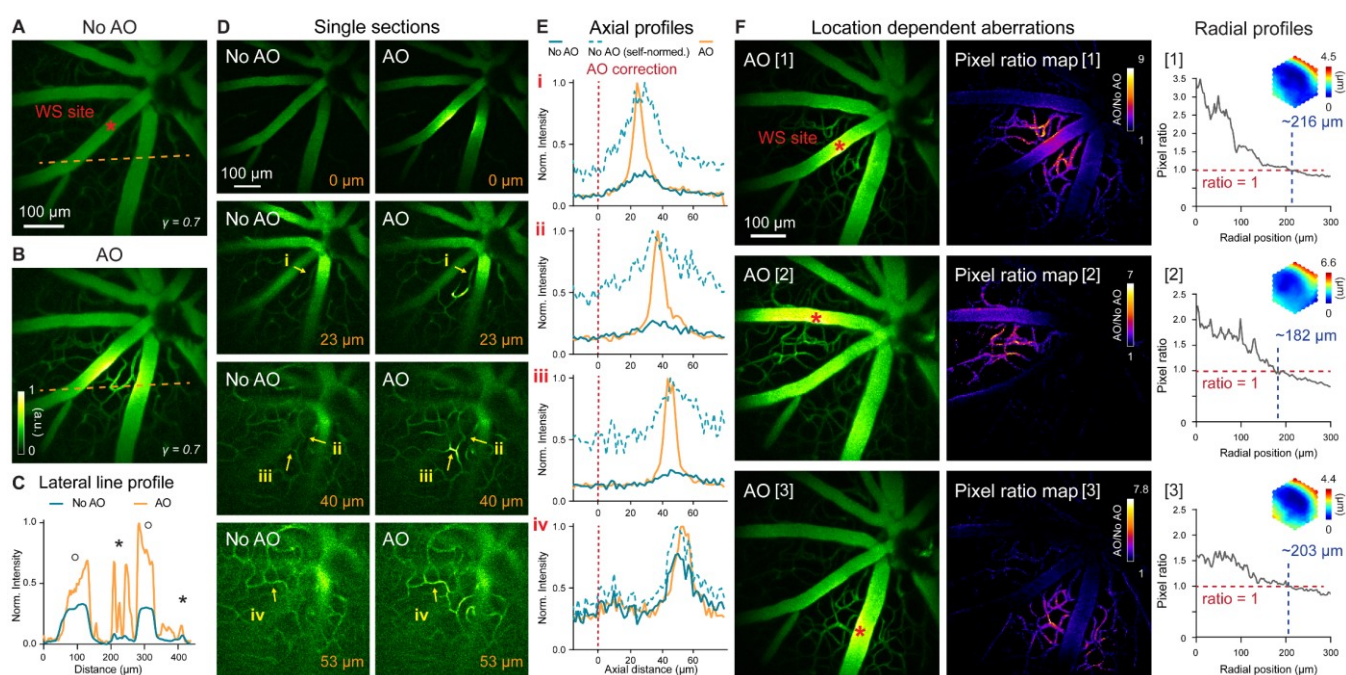

**Figure 2. In vivo imaging of mouse retinal vasculature with AO-2PFM.** (A,B) MIPs of image stacks ( $580 \times 580 \times 128 \mu\text{m}^3$ ) of vasculature measured (A) without and (B) with AO, respectively, normalized to AO image. Red asterisk: center of  $19 \times 19 \mu\text{m}^2$  wavefront sensing (WS) area. Gamma correction: 0.7. Representative data from > 25 experiments (technical replicates). (C) Lateral line profiles along orange dashed lines in A and B. Black circles: large vessels; black asterisks: capillaries. (D) Single image planes at 0, 23, 40, and 53  $\mu\text{m}$  below the superficial vascular plexus acquired without and with AO correction performed at the superficial plexus (0  $\mu\text{m}$ ), normalized to AO images. (E) Axial profiles of capillary structures (i-iv in D). Red dashed lines: depth of wavefront sensing area. (F) Left: MIPs of image stacks ( $580 \times 580 \times 110 \mu\text{m}^3$ ) acquired with WS performed at different locations in the FOV (red asterisks). Middle: AO/No AO pixel ratio maps. Right: radially averaged profiles of pixel ratio maps, centered at WS sites. Insets: corrective wavefronts. MIPs and pixel ratio maps individually normalized.

146 than on larger vessels (**Fig. 2C**, black circles; 2-3 $\times$  improvement). Despite the substantial signal  
 147 improvements enabled by AO, we found that most capillaries, due to their size and sparse distribution in  
 148 space, could be resolved in 3D without AO by our optimized 2PFM, albeit at reduced contrast and resolution

149 **(Fig. 2D,E)**. Our results indicate that a properly designed 2PFM is capable of acquiring retinal angiograms  
150 at the level of individual capillaries.

151 We further evaluated how the mouse ocular aberrations varied with imaging depth and field position. We  
152 found that AO performed at the superficial plexus was beneficial for imaging deeper layers, with the  
153 correction at superficial depth improving signal, resolution, and contrast of deeper vasculature **(Figs. 2D,E)**.  
154 This result indicated that most aberrations of the mouse eye arose from cornea and crystalline lens, instead  
155 of retina. Because the crystalline lens of the mouse eye has a gradient refractive index distribution<sup>42,43</sup>, ocular  
156 aberrations should also be field dependent<sup>44,45</sup>. Field-dependent aberrations might also be introduced when  
157 the mouse eye was positioned off-axis with respect to the eye imaging module. We therefore examined how  
158 aberrations varied with FOV position and characterized the area within which a single correction led to  
159 substantial signal improvement. We performed AO at different locations of the superficial plexus in the FOV  
160 **(Fig. 2F, left column, red asterisks; Supplementary Movie 1)** and compared their performance. The “AO/No  
161 AO” pixel ratio maps **(Fig. 2F, middle column)** exhibited field-dependent signal increase with larger gain  
162 achieved at pixels closer to the locations of aberration measurements. We quantified the effective area of AO  
163 in terms of signal improvement by calculating the radially averaged profiles of these pixel ratio maps **(Fig.**  
164 **2F, right column; origins at the wavefront sensing locations)**. We found signal improvement (“AO/No AO”  
165 pixel ratio  $\geq 1$ ) within a radius of  $\sim 216 \mu\text{m}$  when AO was performed at the FOV center of this mouse **(Fig.**  
166 **2F, [1])**. For off-center locations, this radius was slightly smaller **(Fig. 2F, [2] and [3])**.

### 167 **AO enables 3D cellular resolution imaging of neurons in the mouse retina**

168 The mouse retina consists of multiple layers of neurons with different cell types and distinct physiological  
169 properties. In the early stage of retinal diseases, abnormal morphology and function are usually confined to  
170 specific cell types within a single layer<sup>46</sup>. Therefore, for microscopic investigations of retinal physiology and  
171 pathology, it is essential to resolve cells in 3D. We evaluated whether our optimized 2PFM was capable of  
172 3D cellular resolution imaging without correcting the severe aberrations of the mouse eye.



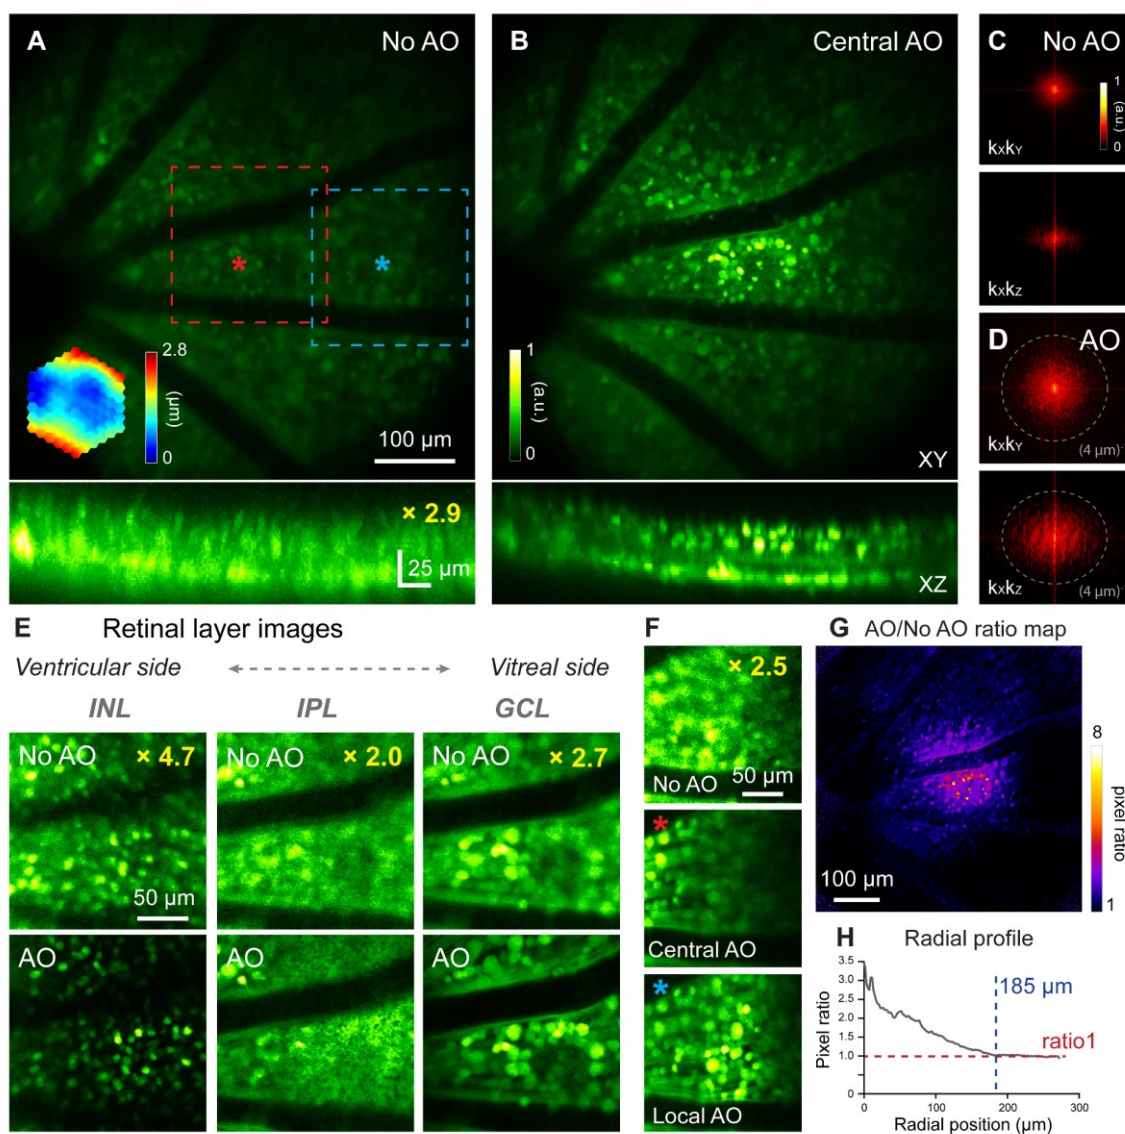

**Figure 3. *In vivo* imaging of mouse retinal neurons with AO-2PFM.** (A,B) MIPs of image stacks ( $580 \times 580 \times 80 \mu\text{m}^3$ ) of a Thy1-YFP-16 retina, measured (A) without and (B) with AO, respectively, normalized to AO images. Red asterisk: center of a  $19 \times 19 \mu\text{m}^2$  WS area. Top: lateral (XY) MIPs. Bottom: axial (XZ) MIPs; ‘No AO’ image brightness artificially increased by  $2.9\times$  for visualization. Representative data from  $> 10$  experiments (technical replicates). (C,D)  $k_x k_y$  and  $k_x k_z$  spatial frequency representation of images in (A,B). (E) Images of different retinal layers within the red dashed box in A acquired (top) without and (bottom) with AO, respectively, normalized to AO images. INL: inner nuclear layer; IPL: inner plexiform layer; GCL: ganglion cell layer. INL/GCL: MIPs of  $4.9/7.8\text{-}\mu\text{m}$ -thick image stacks; IPL: single image plane. ‘No AO’ image brightness artificially increased for visualization (gains shown in each image). (F) Single image planes in GCL at FOV edge (blue dashed box in A) acquired (top) without AO, (middle) with central AO (WS area centered at red asterisk in A), and (bottom) with local AO (WS area centered at blue asterisk in A), respectively. Images normalized to local AO image. ‘No AO’ image brightness artificially increased by  $2.5\times$  for visualization. (G) AO/No AO pixel ratio map. (H) Radially averaged profile of pixel ratio map, centered at red asterisk in A.

173 For this purpose, we imaged the densely fluorescent Thy1-YFP-16 mouse retina *in vivo*, where all bipolar  
 174 cells, amacrine cells, and retinal ganglion cells were labeled with yellow fluorescence protein<sup>34</sup> (YFP). A  
 175 single AO correction acquired by scanning a  $19 \times 19 \mu\text{m}^2$  area (centered on the red asterisk in **Fig. 3A**)

176 substantially improved signal and resolution (**Fig. 3A,B**; Supplementary Movie 2), recovering higher spatial  
177 frequency information in both lateral and axial images (**Fig. 3C,D**). The resolution enhancement was  
178 especially striking along the axial direction, allowing retinal layers to be more clearly differentiated by better  
179 resolving neurons at different depths (**Fig. 3A,B**, XZ images). This improvement in axial resolution is  
180 especially important for functional imaging, because it minimizes neuropil contamination and ensures  
181 accurate characterization of the functional properties of neurons<sup>47-49</sup>. Therefore, AO was necessary for 3D  
182 cellular resolution imaging of retinal neurons *in vivo*. In the lateral image planes, our optimized 2PFM design  
183 and mouse preparation allowed the identification of individual neurons without AO, albeit at lower signal  
184 and poorer resolution than those achieved with AO, for inner nuclear layer, inner plexiform layer, and  
185 ganglion cell layer (**Fig. 3E**). In contrast, subcellular processes could not be visualized without aberration  
186 correction (e.g., processes in the inner plexiform layer, **Fig. 3E**, middle column).

187 Similar to our vascular imaging results, the Thy1-YFP-16 mouse eye exhibited field-dependent aberrations.  
188 For areas away from the AO measurement location (e.g., blue dashed box in **Fig. 3A**), although resolution  
189 improvement remained, the correction acquired at the FOV center (**Fig. 3F**, Central AO) did not increase  
190 signal strength as much as the locally acquired correction (centered on the blue asterisk in **Fig. 3A**; **Fig. 3F**,  
191 Local AO). For the Thy1-YFP-16 mouse, the effective area of AO performed at the FOV center was estimated  
192 from the “AO/No AO” ratio map (**Fig. 3G**) to have a radius of ~185  $\mu\text{m}$  (**Fig. 3H**).

### 193 **Strategy for enlarging the effective area of AO correction for 3D cellular resolution imaging**

194 Imaging retinal vascular and neuronal structures, we found that the spatially-varying aberrations of the mouse  
195 eye limited the effective area for AO correction that was acquired by sensing wavefront from a small region  
196 of the retina (e.g.,  $19 \times 19 \mu\text{m}^2$  for **Figs. 1-3**). Although this approach succeeded in resolving synaptic features  
197 (**Fig. 1C**) and neuronal processes (**Fig. 3E,F**), for applications requiring 3D neuronal population imaging,  
198 synaptic resolution can be sacrificed in favor of cellular resolution imaging capability over larger FOVs. The

199 latter can be achieved by correcting only for global mouse eye aberrations measured by scanning a larger  
 200 retinal region for wavefront sensing.

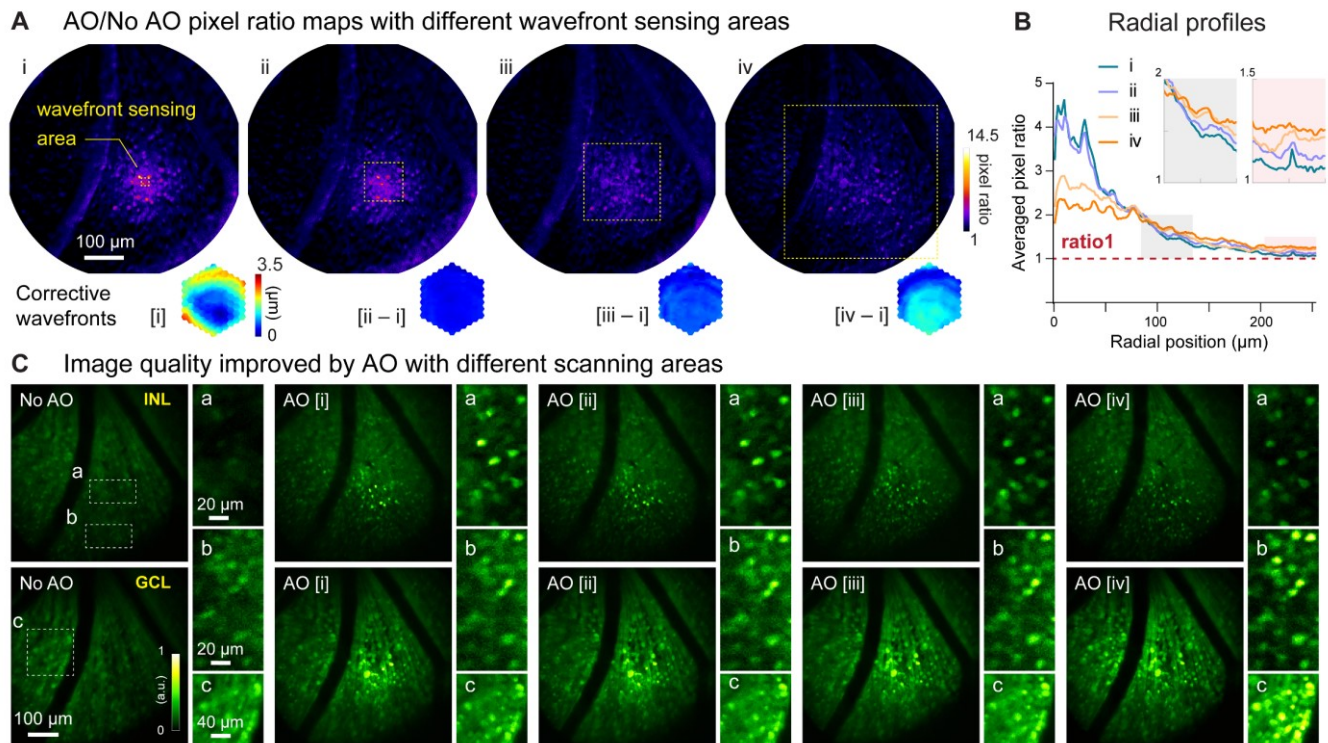

**Figure 4. Larger WS areas enlarges the effective region of AO correction for 3D cellular resolution imaging.** (A) Top: AO/NoAO pixel ratio maps for corrections with differently sized WS areas (yellow dashed boxes; i,  $19 \times 19 \mu\text{m}^2$ ; ii,  $95 \times 95 \mu\text{m}^2$ ; iii,  $190 \times 190 \mu\text{m}^2$ ; iv,  $380 \times 380 \mu\text{m}^2$ ). Bottom: (for [i]) corrective wavefront and (for [ii-iv]) difference in wavefronts between [ii-iv] corrective wavefronts and [i] corrective wavefront. (B) Radially averaged profiles of pixel ratio maps in (A). Insets: zoomed-in views of shaded areas. (C) Single image planes acquired (top) from INL and (bottom) GCL without and with AO using corrective wavefronts [i-iv], respectively. Insets: zoomed-in views of areas at FOV (a) center and (b,c) edge. All images normalized to AO images (AO [i] for inset a; AO [iv] for inset b,c).

201 As a demonstration, for a  $580 \times 580 \mu\text{m}^2$  FOV, we measured aberrations from areas of  $19 \times 19$ ,  $95 \times 95$ ,  
 202  $190 \times 190$ , and  $380 \times 380 \mu\text{m}^2$  (Fig. 4A, i-iv, yellow dashed boxes) and obtained differing corrective  
 203 wavefronts resulting from the spatially varying aberrations. Quantifying and comparing AO effectiveness by  
 204 their “AO/No AO” pixel ratio maps (Fig. 4A), we found that correcting aberrations from smaller areas  
 205 provided greater local signal improvement but exhibited faster decay in signal improvement over distance  
 206 (Fig. 4B, i, ii). This was because the corrective wavefront acquired from a small FOV completely cancelled  
 207 out the local aberrations and led to diffraction-limited imaging of local structures. For structures away from  
 208 the wavefront sensing region and thus experiencing different aberrations, however, the same corrective  
 209 wavefront led to substantial residual aberrations that degraded AO performance. In contrast, correcting



210 aberrations from a larger area reduced signal improvement in the center of the area but enlarged the overall  
211 area within which signal was enhanced, which now extended over the entire imaging FOV (**Fig. 4B**, iii, iv).  
212 Here, the wavefront measured from scanning the guide star over a larger FOV averaged out the local  
213 variations and represented the wavefront distortions common to all field positions. As a result, even though  
214 the improvement at the center of the wavefront sensing area was not as large, by removing the common  
215 aberrations from the entire FOV, this approach led to a larger effective area for AO correction.

216 Importantly, this approach enabled large-scale imaging of the retina with 3D cellular resolution, as  
217 indicated by retinal cell images taken from the center and edge locations (**Fig. 4C**). A more localized  
218 wavefront correction (e.g., AO [i], **Fig. 4C**) gave rise to sharper images at the scanning center (**Fig. 4C**, insets  
219 a), while a more global wavefront measurement (e.g., AO [iv], **Fig. 4C**) benefited more the visualization of  
220 neurons towards the edge of the FOV (**Fig. 4C**, insets b and c). Moreover, with global corrections, neuronal  
221 images at the center of the area maintained cellular resolution despite reduction in signal gain (**Fig. 4C**, insets  
222 a). Our results suggest that for diffraction-limited imaging of fine structures within a small FOV, a localized  
223 wavefront measurement is required, whereas a global wavefront measurement is preferable for 3D cellular  
224 resolution imaging over large FOVs.

225

### 226 **High-resolution *in vivo* identification of abnormal capillaries in a pathological mouse model**

227 Having demonstrated the effectiveness of our AO-2PFM in improving signal, contrast, and spatial resolution  
228 for *in vivo* retinal imaging, we utilized our system to study retinal microvascular pathology. Retinal  
229 angiomatous proliferation (RAP), a subtype of age-related macular degeneration, is characterized by capillary  
230 proliferation that originates from the sensory retina and extends into the subretinal space<sup>50</sup>. Replicating the  
231 characteristic phenotypes of human RAP, a transgenic mouse model, the very low-density lipoprotein  
232 receptor knockout (VLDLR-KO) mouse, has been employed to study the underlying mechanism of RAP. In  
233 this model, the gene encoding VLDLR, which mediates anti-angiogenic signaling in retinal vasculature, is  
234 knocked out, leading to overgrown intraretinal vasculature and subretinal neovascularization<sup>51,52</sup>. In addition,

235 fluorescein angiography revealed that the VLDLR-KO model of proliferative vascular retinopathy has  
236 extensive focal vascular leakage<sup>51-54</sup>. However, the lack of sufficient spatial resolution and optical sectioning  
237 capability makes it challenging for fluorescence angiography to identify the 3D location and characterize the  
238 structure of the vascular lesions *in vivo*.

239 We utilized AO-2PFM to image *in vivo* the retina of VLDLR-KO/Sca1-GFP and their wildtype control  
240 WT/Sca1-GFP mice, both with vascular endothelial cells in the retina labeled with GFP<sup>54</sup>. In order to detect  
241 microscopic capillary pathology, we used  $19 \times 19 \mu\text{m}^2$  wavefront sensing area to achieve diffraction-limited  
242 imaging performance, which led to high-resolution images of endothelial cell linings of retinal vessels in  
243 both mouse lines (**Figs. 5A,B**). Interestingly, in the VLDLR-KO/Sca1-GFP retina, images acquired with AO  
244 revealed a disruption in the capillary endothelium by Sca1-GFP labeling (**Fig. 5A**, yellow asterisks, insets i-  
245 ii; Supplementary Movie 3), which were not observed in the WT/Sca1-GFP retina (**Fig. 5B**). We further  
246 confirmed the presence of such microvascular lesions using *ex vivo* 2PFM imaging of dissected VLDLR-  
247 KO/Sca1-GFP retinas (**Fig. S3A,C**; Supplementary Movie 4). Whereas similarly structured capillary  
248 disruptions were observed in the VLDLR-KO/Sca1-GFP retina, consistent with the *in vivo* investigation,  
249 capillaries in the wildtype control had normal structures (**Fig. S3B,D**; Supplementary Movie 5).

250 We hypothesized that these lesions as capillary disruptions observed in the VLDLR-KO/Sca1-GFP retina  
251 were the locations of dye leakage. To test this hypothesis, enabled by AO, we first located a microvascular  
252 lesion in a VLDLR-KO/Sca1-GFP mouse retina (**Fig. 5C**, orange box, inset). Then we retro-orbitally injected  
253 the green fluorescent dye FITC into the non-imaged eye, which labeled the blood plasma within the retinal



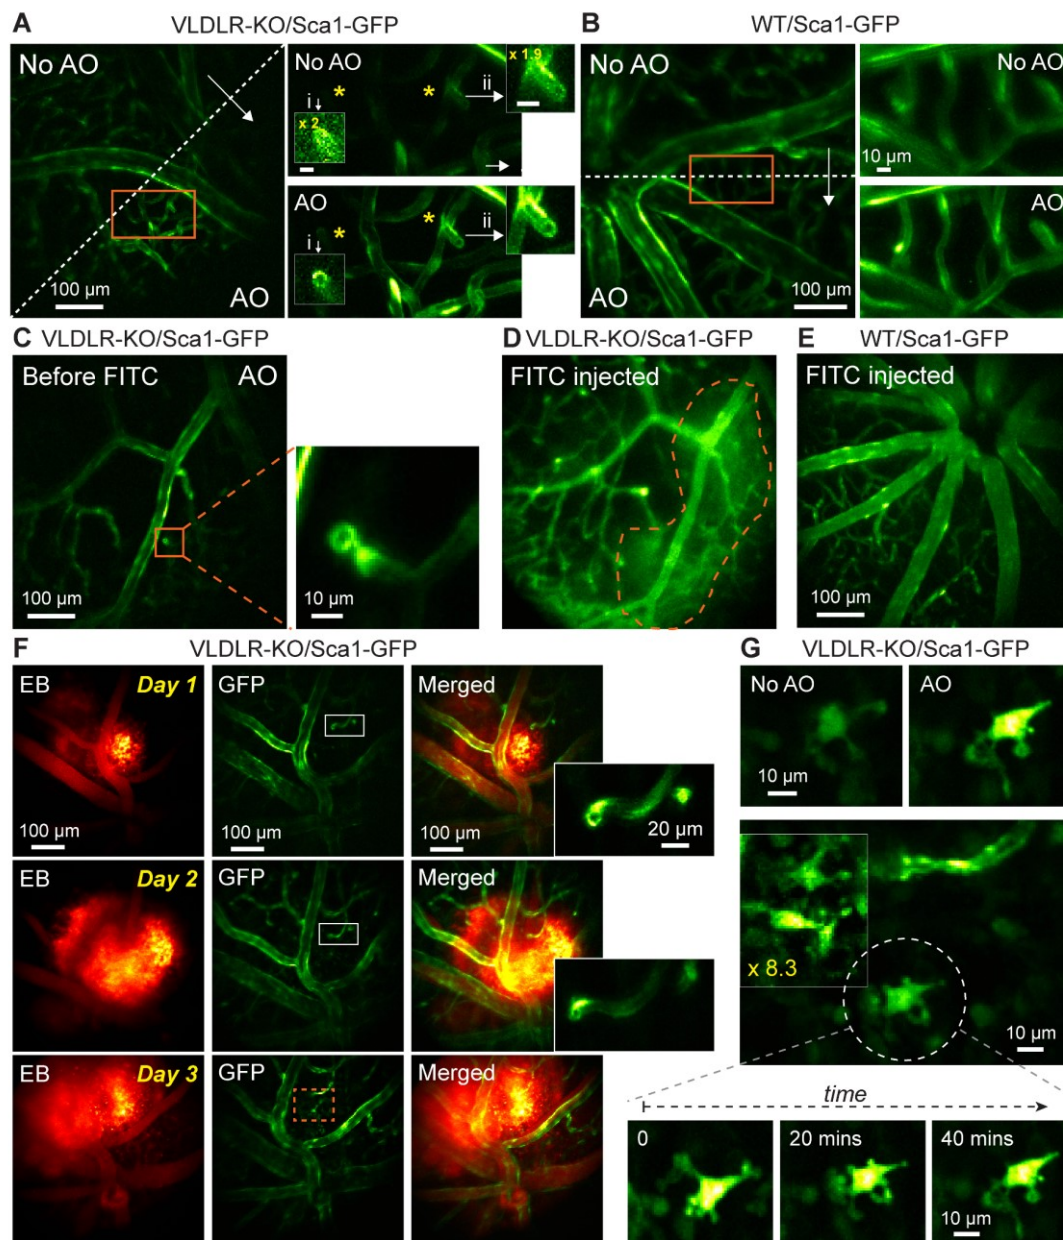

**Figure 5. *In vivo* vasculature imaging in pathological and healthy retinas. (A,B)** Left: MIPs of image stacks of (A) VLDLR-KO/Sca1-GFP ( $580 \times 580 \times 94 \mu\text{m}^3$ ) and (B) WT/Sca1-GFP ( $520 \times 520 \times 120 \mu\text{m}^3$ ) mouse retinas, measured (arrow start) without and (arrow end) with AO. Asterisks: capillary disruptions. Insets: zoomed-in views individually normalized for better visualization. ‘No AO’ inset brightness artificially increased for visualization (gains shown in inset). (C) A single image plane of a VLDLR-KO/Sca1-GFP mouse retina before FITC injection. Inset: MIP of a zoomed-in image stack ( $58 \times 58 \times 8.2 \mu\text{m}^3$ ) showing capillary lesion (orange box). (D) The same FOV in (C) after FITC injection. Dashed region: area with heightened fluorescence outside the vasculature. (E) MIP of an image stack ( $580 \times 580 \times 150 \mu\text{m}^3$ ) of a WT/Sca1-GFP mouse retina after FITC injection. (F) Retinal images taken on (top) day 1, (middle) day 2, and (bottom) day 3 after Evans Blue (EB) injection. Left: near-infrared channel showing EB-labeled vasculature and tissue staining (MIP of a  $580 \times 580 \times 166 \mu\text{m}^3$  volume). Middle: green channel showing GFP-labeled vasculature (single planes). Right: merged images. Insets: zoomed-in views of gray rectangles from the GFP images (single sections). (G) Microglia observed in EB-injected VLDLR-KO/Sca1-GFP mouse retina on day 3 near the lesion site (orange dashed box in F). Top: microglia imaged without and with AO. Middle: multiple microglia in the leaking region. Signal in the boxed region was artificially increased by 8.3× for visualization. Bottom: time-lapse images of the microglia in white dashed circle. All images are single planes. Wavefront sensing area:  $19 \times 19 \mu\text{m}^2$ . *In vivo* data in this Figure were obtained from 3 VLDLR-KO and 2 WT mice (biological replicates).

255 vasculature (**Fig. 5D**). Immediately after dye injection, we observed dye leakage around the lesion site (**Fig.**  
256 **5D**, orange dashed area). A control experiment was carried out by introducing FITC into the healthy  
257 WT/Sca1-GFP mouse retina retro-orbitally, where neither capillary disruptions nor dye leakage were  
258 observed (**Fig. 5E**).

259 To further study the association between dye leakage and microvascular lesions, we injected the NIR dye  
260 Evans Blue (EB) into the retinal vasculature and performed dual-color 2-photon imaging of the VLDLR-KO  
261 retina. Similar to the experiments with FITC, we observed leakage in the knockout mouse retina, with EB  
262 persistently staining retinal tissue and the stained volume expanding over three days of consecutive imaging  
263 (**Fig. 5F**). We observed capillary lesions (**Fig. 5F**, insets) in the stained volume, suggesting a spatial  
264 correlation between dye leakage and capillary abnormalities. Moreover, on the third day, we observed  
265 microglia within the dye-stained retinal volume that did not show up in previous two days (**Fig. 5G**),  
266 suggesting that the leakage of EB triggered local immune response and recruited microglia to the impacted  
267 area. In addition, with AO-2PFM, we were able to track morphological changes in the processes of the same  
268 microglia at subcellular resolution (**Fig. 5G**, bottom). Control experiment in WT/Sca1-GFP retina showed  
269 local small-scale EB leakage (**Fig. S4**), probably resulting from normal remodeling of the retinal vasculature<sup>2</sup>.  
270 Our findings revealed, for the first time, the microscopic morphological details of vasculature lesions and  
271 suggested that these capillary disruptions served as intraretinal origins of vascular leakage in the VLDLR  
272 knockout mouse. Here AO was essential for 2PFM to achieve high-resolution identification and  
273 characterization of microvasculature lesions *in vivo*. Together with our optimized sample preparation, AO-  
274 2PFM also allowed us to track these lesions, dye leakage, and associated immune response longitudinally,  
275 making it possible to investigate the development and progression of vasculature-associated diseases at  
276 subcellular resolution *in vivo*.

277

278 **High-resolution *in vivo* imaging of retinal pharmacology**

279 With the 3D cellular resolution imaging capability enabled by AO-2PFM, we can now image the functional  
280 activity of retinal neurons with high fidelity in healthy or diseased retina *in vivo* using activity sensors such  
281 as the genetically encoded calcium indicator GCaMP6s<sup>55</sup>.

282 As a demonstration, we studied how pharmacological manipulation affects RGC activity *in vivo* in a  
283 mouse model of retinal degeneration. As the afferent neurons of the retina, RGCs deliver retinal circuit output  
284 to the rest of the brain and play a crucial role in visual perception. RGCs in the *rdl* mouse, the oldest and  
285 most widely studied animal model of retinal degeneration<sup>56</sup>, become hyperactive after photoreceptor death  
286 caused by a mutation in the *Pde6b* gene<sup>57,58</sup>. Recent studies have suggested that RGC hyperactivity masks  
287 light-evoked signals initiated by surviving photoreceptors and impedes remaining light-elicited behaviors<sup>58,59</sup>.  
288 Studying RGC hyperactivity therefore is of great importance both for understanding the pathology of retinal  
289 degeneration and for developing pharmacological therapies<sup>60</sup>. However, RGC hyperactivity has been only  
290 studied *ex vivo* on dissected retinas<sup>58,60</sup>, preventing longitudinal evaluation of degeneration progression and  
291 therapeutic approaches.

292 Here we characterized RGC hyperactivity *in vivo* and studied the effect of Lidocaine, a use-dependent  
293 Na<sup>+</sup> channel blocker, on alleviating hyperactivity of RGCs in the *rdl*-Thy1-GCaMP6s mouse using AO-  
294 2PFM and calcium imaging. Because RGC hyperactivity is usually studied by *ex vivo* tools such as multi-  
295 electrode array (MEA) or single cell electrophysiology recordings, to establish the calcium signature of RGC

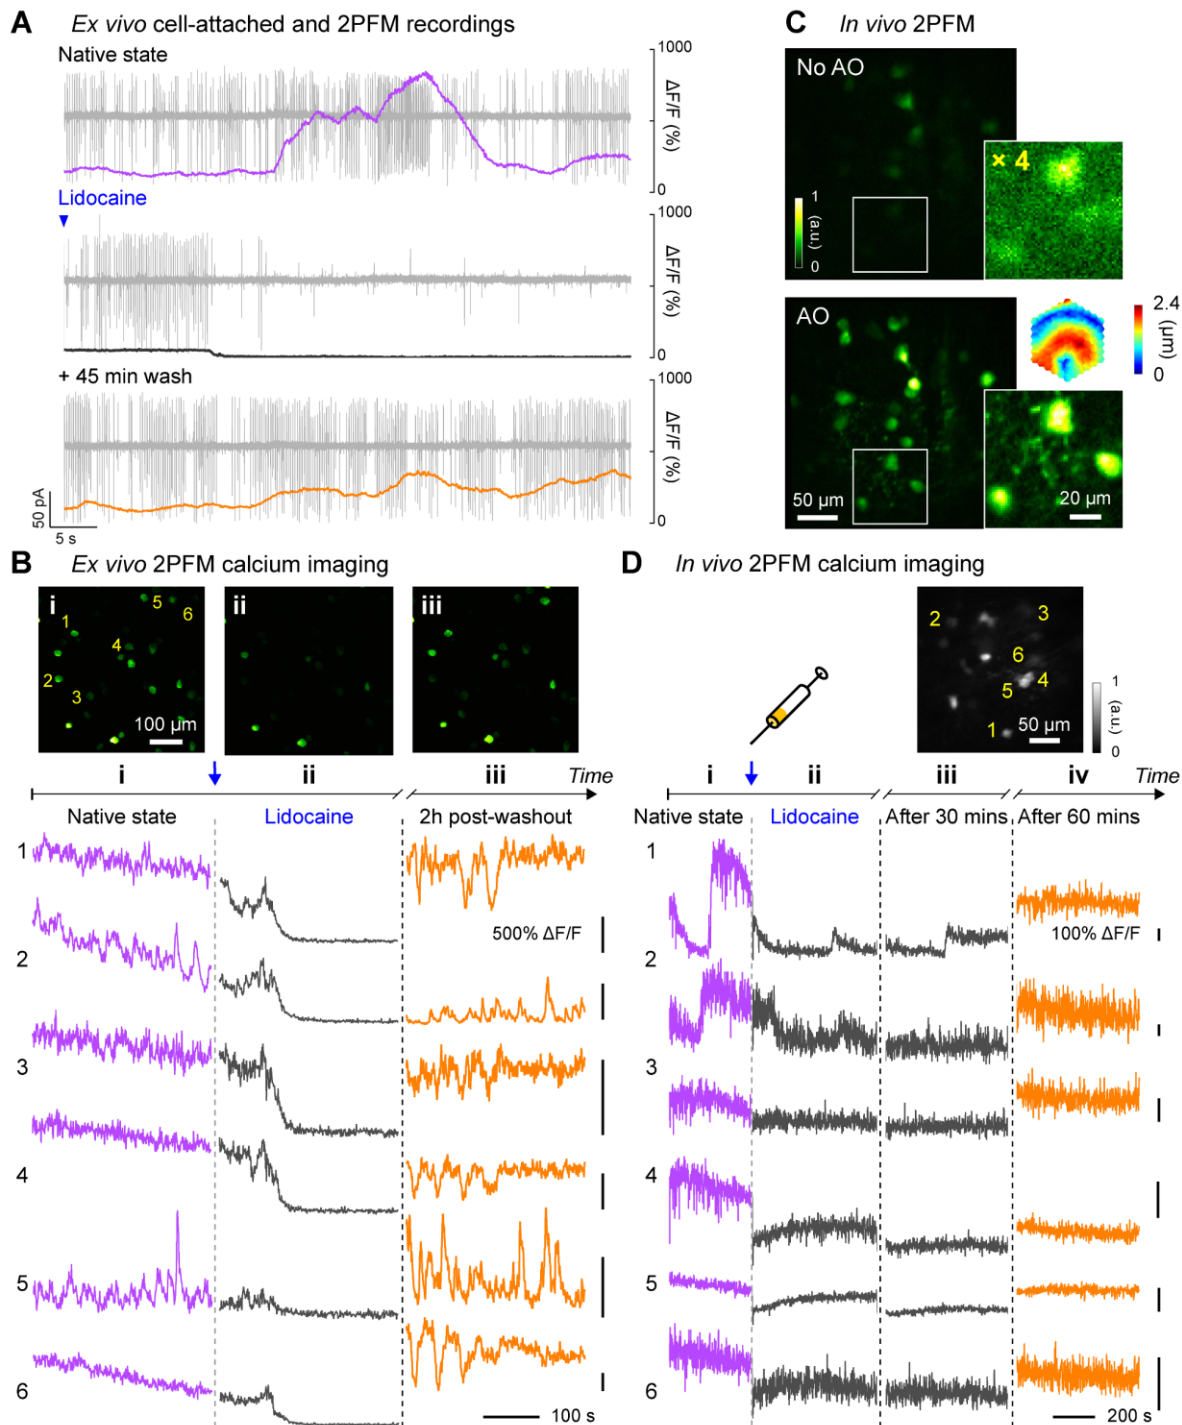

**Figure 6. *In vivo* calcium imaging of Lidocaine-suppressed RGC hyperactivity in *rd1*-Thy1-GCaMP6s mouse retina.** (A) Simultaneous cell-attached and 2PFM calcium recordings of a RGC before, during, and 45 mins after Lidocaine treatment. Representative data from > 3 cells. (B) Top: average intensity projections of *ex vivo* 2PFM images of RGCs in a dissected retina (i) before, (ii) right after, and (iii) 2 hours after Lidocaine treatment, normalized to the left image. Bottom: *Ex vivo* calcium dynamics of 6 RGCs therein. Representative data from > 3 retinas. (C) *In vivo* single image planes of RGCs acquired without and with AO, respectively, normalized to AO images. Insets: zoomed-in views and corrective wavefront; ‘No AO’ inset brightness artificially increased by 4.0× for visualization. Representative data from > 3 retinas. (D) *In vivo* calcium dynamics of 6 RGCs (i) before, (ii) right after, (iii) 30 minutes after, and (iv) 60 minutes after Lidocaine treatment, respectively. Wavefront sensing area:  $19 \times 19 \mu\text{m}^2$ . Representative data from 1 retina.



297 hyperactivity, we first carried out simultaneous cell-attached and *ex vivo* 2PFM calcium recordings of the  
298 same hyperactive alpha RGCs in a dissected *rdl* mouse retina (**Fig. 6A**). Consistent with previous reports on  
299 *ex vivo* retina<sup>58-60</sup>, RGC hyperactivity was observed as high-frequency action potentials. In terms of calcium  
300 signaling (quantified as calcium response magnitude  $\Delta F/F$ , with F being baseline brightness and  $\Delta F$  being  
301 the difference from baseline brightness), hyperactivity measured *ex vivo* was correlated with a heightened  
302  $\Delta F/F$  of the GCaMP6s-expressing soma. A temporally varying firing rate led to fluctuations in the  $\Delta F/F$  of  
303 its calcium signal. After ~20 seconds of 2% Lidocaine bath perfusion, spontaneous spiking from the RGC  
304 was largely suppressed with a  $\Delta F/F$  close to 0. After artificial cerebrospinal fluid (ACSF) washout, RGC  
305 hyperactivity partially recovered, which was associated with an increase of  $\Delta F/F$  magnitude. The observed  
306 time course and suppressive effect of Lidocaine application on RGC hyperactivity were consistent with *ex*  
307 *vivo* multi-electrode array (MEA) recordings (**Fig. S5A,B**). The characteristics of the corresponding calcium  
308 responses were also observed in 2-photon population imaging of multiple RGCs in dissected *rdl* retina (**Fig.**  
309 **6B**), with the brightness and  $\Delta F/F$  of the GCaMP6s-expressing neurons reduced by Lidocaine application  
310 and followed by partial or full recovery after washout.

311 Having confirmed that RGC hyperactivity was associated with heightened calcium levels, we next performed  
312 AO-2PFM calcium imaging to directly study how Lidocaine affected RGC hyperactivity *in vivo*. Through  
313 the *rdl*-Thy1-GCaMP6s mouse eye, AO increased RGC brightness by on average 4× and enabled high-  
314 resolution visualization of both RGC somata and their processes (**Fig. 6C**). The signal increase enabled by  
315 AO was particularly important for the *rdl*-Thy1-GCaMP6s mouse, because the RGCs here had dimmer  
316 fluorescence than the other lines that we investigated. For these RGCs, correcting the eye-induced aberration  
317 was essential for their visualization and high-fidelity functional investigations at cellular resolution *in vivo*.  
318 To maximize the fluorescence signal, we performed AO with a small ( $19 \times 19 \mu\text{m}^2$ ) wavefront sensing area.  
319 Before injecting Lidocaine, we observed slow fluctuations in the brightness of GCaMP6s-expressing RGCs  
320 (**Fig. 6D, i**), similar to the slow dynamic events in RGC calcium traces measured *ex vivo*. One minute after



321 retro-orbital injection of Lidocaine into the non-imaged eye, hyperactivities from these cells were  
322 substantially inhibited for an hour as indicated by the reduction of RGC GCaMP6s fluorescence brightness  
323 (**Fig. 6D**, ii and iii). Imaging the same RGCs 60 mins after injection (**Fig. 6D**, iv), we detected partial to  
324 complete recovery of RGC brightness, consistent with our *ex vivo* recordings after washing out. Here, by  
325 studying the suppression effects of Lidocaine on RGC hyperactivity within living mice, we demonstrated  
326 that AO-2PFM can monitor the pathology and pharmacology of retinal diseases at high resolution *in vivo*.

327

## 328 **Discussion**

329 By optimizing optical design and sample preparation and using direct wavefront sensing AO to correct mouse  
330 eye aberrations, we demonstrated here the first *in vivo* visualization of retinal synaptic structures, the first *in*  
331 *vivo* identification of capillary lesions with sub-capillary details, and the first *in vivo* detection of RGC  
332 hyperactivity and its suppression by pharmacological reagents.

333 To image mouse retina *in vivo* with 2PFM, one can either utilize a standard objective lens<sup>19,40</sup> or the mouse  
334 eye's optics itself<sup>23,26</sup> to focus the excitation light and collect the fluorescence emission. The former approach  
335 requires long-working-distance objective lenses and, more importantly, suffers from severe aberrations  
336 caused by the refractive power of the ocular optics (mostly crystalline lens, as cornea was typically flattened  
337 in these systems). For this reason, to achieve the best image quality and the largest FOV size, using mouse  
338 eye itself as the focusing element as implemented here is preferable.

339 Among the studies that used the mouse eye optics for imaging, discrepancies exist in how large the mouse  
340 ocular aberrations are and how essential AO is for vasculature and cellular imaging in the mouse retina. For  
341 the multiple mouse strains investigated here (i.e., wild-type (C57BL/6), Thy1-GFP line M, Thy1-YFP-16,  
342 VLDLR-KO/Sca1-GFP, WT/Sca1-GFP, and *rd1*-Thy1-GCaMP6s), we found that their ocular aberrations  
343 were typically within the range of 3~5  $\mu\text{m}$  peak-to-valley (P-V; after removing tip, tilt, and defocus) and  
344 0.4~0.8  $\mu\text{m}$  rms (**Fig. S6**) without notable differences in severity across strains. While consistent with most  
345 previously reported values<sup>21,25</sup>, our study differs significantly from a recent AO-2PFM study that reported

346 extremely large aberrations (e.g., 12-25  $\mu\text{m}$  P-V<sup>26</sup>) and found it difficult to resolve microvasculature and cell  
347 bodies in 2D *in vivo* without AO. In contrast, with our carefully designed microscope and system aberration  
348 correction procedure, we achieved capillary visualization, 2D single-cell resolution, and retinal layer  
349 differentiation by only correcting system aberrations ('No AO' in our case). Given that our system aberrations  
350 were much smaller than mouse ocular aberrations (**Fig. S6**), our study indicated that a well-engineered 2PFM  
351 like ours should be sufficient for *in vivo* retinal imaging applications requiring only capillary and 2D cellular  
352 resolution.

353 One factor that strongly impacted image and wavefront sensing quality was the sample preparation  
354 procedure. We found that our specially designed 0-diopter contact lens encircled with a supportive flat base  
355 were essential for high-quality imaging by 2PFM both without and with AO (**Fig. S2**). Similar improvement  
356 in imaging quality by 0-diopter contact lens was reported previously for *in vivo* optical coherence tomography  
357 imaging of the rat retina, where it was hypothesized that the application of the contact lens smoothed corneal  
358 defects and reduced wavefront error of the anterior segment of the eye<sup>61</sup>. The supportive flat base encircling  
359 the optical zone of our contact lens<sup>62</sup> and the gel completely separated the eye surface from air and prevented  
360 cataract formation. Together, they enabled high-quality SH images and accurate corrective wavefronts to be  
361 acquired throughout the experiment.

362 Incorporating direct-wavefront-sensing-based AO with 2PFM, we found that location-dependent  
363 aberrations led to local improvement in the mouse retina *in vivo*. To enlarge the high-resolution area enabled  
364 by AO, one way is to stitch images from smaller areas, each with its own local AO correction<sup>44,45,63</sup>. However,  
365 this procedure can be time-consuming and thus nonideal for *in vivo* functional studies. By scanning  
366 differently sized areas for wavefront sensing, we identified a trade-off between AO performance (i.e.,  
367 resolution and signal enhancement) and effective area. We demonstrated that a single corrective wavefront  
368 acquired by scanning the guide star over a more extended area led to 3D cellular resolution imaging over a  
369 larger retinal volume, simplifying the procedure for future functional studies of neuronal populations in the  
370 retina. It is worth noting that, instead of incorporating scan lenses optimized for large scanning angles, our

371 homebuilt 2PFM system utilized regular achromatic doublet lenses, which reduced cost but limited the  
372 overall imaging FOV of our microscope. The effective AO area and imaging FOV would be further increased  
373 by incorporating high-performance scan lenses.

374 To study retinal pathologies for physiological and clinical insights, it is ideal to conduct longitudinal  
375 investigations *in vivo*. Importantly, to probe microscopic early-stage pathologies, high spatial resolution is  
376 needed. In human applications, investigation of retinal vascular abnormalities are limited to capillary  
377 resolution<sup>64,65</sup>. Sub-capillary morphology and dynamics of the mouse retina were recently observed by light-  
378 sheet microscopy, however with *ex vivo* preparations<sup>66</sup>. To our knowledge, sub-capillary features had not  
379 been observed in the living mouse eye previously. In this work, applying AO-2PFM, we studied retinal  
380 vasculature in a pathological mouse model with proliferative vascular retinopathy at sub-capillary resolution  
381 *in vivo*. Recovering diffraction-limited resolution, AO enabled us to identify capillary lesions as capillary  
382 endothelium disruptions that were associated with dye leakage in 2-photon fluorescence angiograms.  
383 Moreover, the repeatable and reliable AO performance allowed us to track the same retinal region over  
384 multiple days and discover lesion-associated immune response and microglia migration at subcellular  
385 resolution. Our results show far-reaching potential of AO-2PFM for mechanistic understanding and early  
386 diagnosis of retinal diseases.

387 We also applied our AO-2PFM to *in vivo* activity imaging of RGCs in a mouse model of retinal  
388 degeneration. Due to the dimmer brightness of the fluorescence indicator in this model, AO was essential in  
389 increasing signal strength and enabling high-sensitivity interrogation of the effects of pharmacological  
390 manipulation on RGC hyperactivity. Traditionally, pharmacological effects on retina are studied by  
391 electrophysiological and imaging tools on *ex vivo* retinal preparation, or *in vivo* by indirect assessments  
392 downstream in the visual pathway or through behavior test<sup>59</sup>. Taking retinal degeneration as an example,  
393 treatment-induced photosensitization enhancement has been mainly evaluated through electrophysiology or  
394 *ex vivo* imaging of dissected retinas. AO-2PFM enabled us to evaluate how pathological RGC hyperactivity  
395 was suppressed by an example pharmacological agent, lidocaine, at single cell level noninvasively. Together

396 with the capability for longitudinal investigations discussed above, we envision that the AO-enabled high-  
397 sensitivity subcellular and cellular 2PFM imaging would become a highly enabling technology for  
398 pathological and pharmacological investigations of the mouse retina *in vivo*.

399

400

## 401 **Materials and methods**

### 402 **Animal use**

403 All animal experiments were conducted according to the National Institutes of Health guidelines for animal  
404 research. Procedures and protocols (AUP-2020-06-13343) were approved by the Institutional Animal Care  
405 and Use Committee at the University of California, Berkeley.

406

### 407 **AO two-photon fluorescence microscope (AO-2PFM)**

408 The AO-2PFM was built upon a homebuilt 2PFM (**Fig. 1A**) incorporated with a direct-wavefront-sensing-  
409 based AO module, as described in detail previously<sup>27</sup>. Briefly, 920-nm output from a femtosecond  
410 Ti:Sapphire laser (Coherent, Chameleon Ultra II) was expanded (2×, Thorlabs, GBE02-B) after a Pockel Cell  
411 (ConOptics, 350-80-LA-02-BK). The beam was then scanned with a pair of optically conjugated (by L1-L2,  
412 FL = 85 mm; Edmund Optics, 49-359-INK) galvanometer mirrors (Cambridge Technology, 6215H). A pair  
413 of achromatic lenses (L3-L4, FL = 85 and 300 mm; Edmund Optics, 49-359-INK and 49-368-INK) relayed  
414 the galvos to the DM (Iris AO, PTT489). The focal plane position of two-photon excitation in the mouse  
415 retina was controlled by an electrically tunable lens (ETL; Optotune, EL-16-40-TC-VIS-5D-C), which was  
416 conjugated to the DM (by L5-L6, FL = 175 and 400 mm; Edmund Optics, 49-363-INK and Newport,  
417 PAC090). The ETL was then relayed to the pupil of the mouse eye by L7 (FL = 200; Thorlabs, AC254-200-  
418 AB) and L8, which was composed of two identical lenses (FL = 50 mm; Thorlabs, AC254-050-AB). The  
419 two 50-mm-FL lenses in L8 were used together with a combined FL of 25 mm, and they were mounted with  
420 their curved surfaces facing and almost touching each other (**Fig. S1A,D**) to minimize aberrations during

421 large-angle scanning. For 2PFM imaging, the emitted fluorescence from the mouse retina was collected by  
422 the mouse eye, travelled through L8-L7 and the ETL, reflected by a dichroic mirror (D2; Semrock, Di02-  
423 R785-25×36), focused by a lens (L9, FL = 75 mm; Thorlabs, LB1309-A), and detected by a photomultiplier  
424 tube (PMT, Hamamatsu, H7422-40). For direct wavefront sensing, D2 was moved out of the light path and  
425 the emitted fluorescence was descanned by the galvo pair, reflected by a dichroic mirror (D1; Semrock, Di03-  
426 R785-t3-25×36), and relayed to a Shack-Hartmann (SH) sensor by a pair of lenses (L10-L11, FL = 60 and  
427 175 mm; Edmund Optics, 47-638-INK and 47-644-INK). The SH sensor was composed of a lenslet array  
428 (Advanced Microoptic System GmbH, APH-Q-P500-R21.1) and a camera (Hamamatsu, Orca Flash 4.0) that  
429 was placed at the focal plane of the lenslet array. Wavefront aberrations were measured from the shifts of SH  
430 pattern foci, reconstructed with custom MATLAB code, and the corresponding corrective pattern was then  
431 applied to the DM.

432

### 433 **System correction**

434 Before imaging the mouse retina, system aberration caused by imperfect and/or misaligned optics was  
435 corrected. Due to the path difference between the two-photon illumination and the fluorescence wavefront  
436 sensing paths<sup>67</sup>, system correction was performed with a modal-based optimization approach<sup>25,68</sup>.  
437 Specifically, with 0 mA applied to the ETL, we imaged a fluorescent lens tissue sample at the focal plane of  
438 L7 and applied 11 values (-0.1 ~ 0.1  $\mu\text{m}$  rms at an increment of 0.02  $\mu\text{m}$ ) for each of the first 21 Zernike  
439 modes excluding piston, tip, tilt, and defocus. The optimal value for each Zernike mode was determined by  
440 maximizing the fluorescence intensity of the sample and it was applied to the DM before proceeding to the  
441 next Zernike mode. An SH pattern was obtained with system aberration corrected and was used as the SH  
442 reference for calculating sample-induced aberrations. All images taken with system correction were indicated  
443 in the main text as “No AO”.

444 To change the focal plane within the retina, we varied the electric current applied to the ETL. We  
445 characterized how system aberrations varied with the ETL current (**Fig. S1**). We carried out system correction



446 with 0 mA ETL current applied (**Fig. S6A**). Additional aberrations introduced by setting ETL current to 20,  
447 40, 60, and 80 mA were negligible (**Fig. S1B**) compared with eye-induced aberrations (**Fig. S6**) and  
448 minimally affected *in vivo* imaging (**Fig. S1C**). We also evaluated how system aberrations varied with the  
449 distance D between the mouse eye pupil and the imaging module (**Fig. S1D**). Using Zemax® for ray tracing,  
450 we found its effect to be similarly minimal (**Fig. S1E**). Our typical *in vivo* retinal imaging was performed  
451 with 10~60 mA of ETL currents and 2~4 mm D values (**Fig. S1D**). Simulating the mouse eye as an ideal lens  
452 behind a 0-diopter contact lens (**Fig. S2A**) made of PMMA (1.49 refractive index) and 0.5-mm-thick eye gel  
453 (1.33 refractive index), we calculated the focal shifts and FOVs for different ETL currents using Zemax®  
454 and found a linear focal shift with ETL current and relatively constant FOV during 3D imaging (**Fig. S1F**).  
455 Imaging FOV and axial shift were determined from Zemax® simulation for D = 2 mm.

456

### 457 ***In vivo* imaging**

458 All mice (Wild-type C57BL/6J and Thy1-YFP-16, the Jackson laboratory; VLDLR-KO/Sca1-GFP and  
459 WT/Sca1-GFP, Gong lab; GCaMP6s-*rd1*, Kramer lab) were at least 8 weeks old at the time of imaging. *In*  
460 *vivo* imaging was carried out on mice under isoflurane anesthesia (~ 1.0% by volume in O<sub>2</sub>). Prior to imaging,  
461 the mouse pupil was dilated with one drop of 2.5% phenylephrine hydrochloride (Paragon BioTeck, Inc) and  
462 one drop of 1% tropicamide (Akorn, Inc). A 0-diopter customized rigid contact lens (**Fig. S2A**, Advanced  
463 Vision Technologies) was placed on the eye, with eye gel (Genteal) applied in between the eye and the  
464 contact lens to prevent cornea drying and clouding. Excessive eye gel was removed by gently pressing the  
465 contact lens onto the mouse eyeball. One single application of eye gel was sufficient in keeping the cornea  
466 moist for a 2~4-hour imaging session. During imaging, mice were stabilized on a bite-bar on a 3D  
467 translational stage with two rotational degrees of freedom (Thorlabs, PR01) and the body temperature was  
468 maintained with a heating pad (Kent Scientific, RT-0515). The mouse head was carefully aligned to make  
469 the eye perpendicular to the illumination beam, minimizing off-axis aberrations and illumination clipping by  
470 the contact lens and mouse pupil. Fluorescent dyes were injected retro-orbitally into the non-imaged eye. In

471 wild-type mice, 40-80  $\mu$ L of 5% (w/v) 2M-Da dextran-conjugated FITC was injected for vasculature  
472 visualization. In some VLDLR-KO/Sca1-GFP mice, 30-40  $\mu$ L of 5 mg/mL FITC or 5 mg/mL Evans Blue  
473 were injected. To generate bright enough fluorescent guide star for direct wavefront sensing in the weakly-  
474 fluorescent mouse line *rdl*-Thy1-GCaMP6s, 20-40  $\mu$ L of 5 mg/mL Evans Blue was injected. To suppress  
475 RGC hyperactivity in *rdl*-Thy1-GCaMP6s mouse retina, we retro-orbitally injected 10  $\mu$ L of 2% Lidocaine  
476 into the non-imaged eye.

477 All imaging parameters, including laser power at the mouse pupil, are listed in Table S1.

478

### 479 **Retina dissection**

480 Mice were first euthanized by isoflurane overdose followed by cervical dislocation. Then the eyes were  
481 removed, and the retinas were isolated and immersed in standard oxygenated (95% O<sub>2</sub>, 5% CO<sub>2</sub>) artificial  
482 cerebrospinal fluid (ACSF) at room temperature and pH 7.2.

483

### 484 ***Ex vivo* 2-photon structural imaging of dissected Sca1-GFP mouse retinas**

485 A commercial 2-photon fluorescence microscope (Bergamo<sup>®</sup>, Thorlabs) was used to image dissected Sca1-  
486 GFP mouse retinas (**Fig. S3**). 2-photon excitation at 920 nm was provided by a femto-second laser (Coherent,  
487 Chameleon Ultra II). *Ex vivo* images were acquired by a 16 $\times$ 0.8NA water-dipping objective lens (Nikon).  
488 Hardware controls and data acquisition were performed by ThorImage.

489

### 490 **Multielectrode array (MEA) recordings**

491 Isolated *ex vivo* *rdl*-Thy1-GCaMP6s retinas were cut into three pieces. Each piece was mounted onto a 60-  
492 electrode MEA chip (60ThinMEA200/300iR0ITO, Multichannel Systems) with the inner retina facing the  
493 array, so that RGCs were in close contact with electrodes. The chip was connected to an amplifier (MEA1060,  
494 Multichannel Systems) for wide-band extracellular recording of multi-unit activity. Before the onset of  
495 recording, the retina was perfused with oxygenated ACSF at 34 °C for 30 min with a flowrate of 1 mL/min.

496 For pharmacological blockade of action potentials, Lidocaine (2% in saline) was applied to the bath during  
497 corresponding recordings. Washout of lidocaine was performed by continuously perfusing oxygenated ACSF  
498 at 34°C over the course of two hours with a flowrate of 1 mL/min.

499 Recorded activity from RGCs were high-pass filtered at 200 Hz, digitized at 20 kHz, and analyzed offline.  
500 Extracellular spikes were defined as transient signals with peak deflection of >3.5 standard deviations from  
501 the root mean square of background signal. Because individual electrodes can detect spikes from multiple  
502 RGCs, we utilized principal component analysis to sort unique units (Offline Sorter v3, Plexon), which  
503 accepted units having interspike intervals >1 ms. Each unit was compiled into a raster plot. The analysis code  
504 for processing sorted spike data into rasters is available online ([https://github.com/kookstance/  
505 Multielectrode-array](https://github.com/kookstance/Multielectrode-array)).

### 507 **Cell attached recordings of alpha-RGCs in *rd1*-Thy1-GCaMP6s retinas**

508 Isolated *ex vivo* *rd1*-Thy1-GCaMP6s retinas were mounted onto filter paper (0.45 mm nitrocellulose  
509 membranes, MF-Millipore) with an optical window with the ganglion cell layer facing up. RGCs were  
510 visualized with DODT contrast infrared optics (Luigs and Neumann) and were targeted for whole cell  
511 recording with glass electrodes (4-6 MΩ) filled with ACSF. Loose- (< 1 GΩ) and tight-seal patches (> 1  
512 GΩ) were obtained under voltage clamp with the command voltage set to maintain an amplifier current of 0  
513 pA. Input resistance and series resistance were monitored throughout recording to ensure stable recording  
514 quality and cell health.

### 516 ***Ex vivo* 2-photon calcium imaging of *rd1* mouse retina**

517 2-photon calcium imaging of *rd1*-Thy1-GCaMP6s retina was carried out on a custom galvo-scanning  
518 microscope (<https://wiki.janelia.org/wiki/display/shareddesigns/Non-MIMMS+in+vivo+microscope>)  
519 equipped with a 20× 1.0 NA water immersion objective (XLUMPLFLN20XW, Olympus). Excitation at 920  
520 nm was provided by a tunable Ti:Sapphire ultrafast laser (Chameleon Ultra, Coherent). Imaging parameters

521 were controlled by ScanImage 3.8.1 software (<http://scanimage.vidriotechnologies.com/>): 256×256 pixels at  
522 1.25 Hz (2 ms per line). GCaMP6s emission was collected with a GaAsP PMT shielded by a longpass filter  
523 (ET500lp, Chroma).

524 Isolated retinas were cut into four-leaf clovers and transferred onto filter paper (0.45 mm nitrocellulose  
525 membranes, MF-Millipore) with the ganglion cell layer facing up. Oxygenated ACSF was then perfused over  
526 the retina at 34°C for 30 minutes with a flowrate of 1 mL/min. An initial imaging session performed to  
527 account for potential 2-photon sensitivity. Experimental imaging was performed with the laser power at the  
528 sample  $\leq 5$  mW. For pharmacological blockade of actional potentials, Lidocaine (2% in saline) was applied  
529 to the bath during corresponding recordings. Washout of lidocaine was performed by continuously perfusing  
530 oxygenated ACSF at 34°C over the course of two hours with a flowrate of 1 mL/min.

531

### 532 **Image processing and analysis**

533 All image processing, visualization, and analysis were performed in ImageJ<sup>69</sup>. To remove motion-induced  
534 artifacts, image registration (TurboReg and StackReg plugins) was performed.

535

### 536 **Acknowledgements**

537 We thank Tyson Kim and Bingyao Tan for helpful discussions. This work was supported by US National  
538 Institutes of Health grants U01NS103489 (Q.Z., W.C., and N.J.), U01NS118300 (Q.Z. and N.J.),  
539 RF1MH120680 (Y.Y., W.C., and N.J.), F32EY029983 (K.J.C.), R01EY024334 and P30EY003176 (R.H.K.),  
540 NIH/EY013849 (S.P., C.H.X., and X.G.).

541

### 542 **Data availability**

543 All data generated or analyzed in this study are included in the manuscript and supporting files. Source data  
544 files have been provided for all primary figures. The Zemax file of the eye imaging module has been provided.

545

546 **References**

- 547
- 548 1. Kandel, E. R., Koester, J. D., Mack, S. H. & Siegelbaum, S. A. *Principles of neural science, sixth*  
549 *edition*. (McGraw-Hill, 2021).
- 550 2. Selvam, S., Kumar, T. & Fruttiger, M. Retinal vasculature development in health and disease. *Prog.*  
551 *Retin. Eye Res.* **63**, 1–19 (2018).
- 552 3. A. P. Schachar, C. P. Wilkinson, D. R. Hinton, S. R. Sadda, P. W. *Ryan's Retina*. (Elsevier Health  
553 Sciences, 2017).
- 554 4. Cheung, C. Y. Iui, Ikram, M. K., Chen, C. & Wong, T. Y. Imaging retina to study dementia and  
555 stroke. *Prog. Retin. Eye Res.* **57**, 89–107 (2017).
- 556 5. London, A., Benhar, I. & Schwartz, M. The retina as a window to the brain—from eye research to  
557 CNS disorders. *Nat. Rev. Neurol.* **9**, 44–53 (2013).
- 558 6. Lechner, J., O'Leary, O. E. & Stitt, A. W. The pathology associated with diabetic retinopathy. *Vision*  
559 *Res.* **139**, 7–14 (2017).
- 560 7. Ivanova, E., Corona, C., Eleftheriou, C. G., Bianchimano, P. & Sagdullaev, B. T. Retina-specific  
561 targeting of pericytes reveals structural diversity and enables control of capillary blood flow. *J.*  
562 *Comp. Neurol.* **529**, 1121–1134 (2021).
- 563 8. Jo, A. *et al.* Intersectional Strategies for Targeting Amacrine and Ganglion Cell Types in the Mouse  
564 Retina. *Front. Neural Circuits* **12**, 1–15 (2018).
- 565 9. Martersteck, E. M. *et al.* Diverse Central Projection Patterns of Retinal Ganglion Cells. *Cell Rep.* **18**,  
566 2058–2072 (2017).
- 567 10. Eme-Scolan, E. & Dando, S. J. Tools and Approaches for Studying Microglia In vivo. *Front.*  
568 *Immunol.* **11**, 1–10 (2020).
- 569 11. Denk, W., Strickler, J. H. & Webb, W. W. Two-Photon Laser Scanning Fluorescence Microscopy.  
570 *Science* **248**, 73–76 (1990).
- 571 12. Euler, T., Detwiler, P. B. & Denk, W. Directionally selective calcium signals in dendrites of  
572 starburst amacrine cells. *Nature* **418**, 845–852 (2002).
- 573 13. Baden, T. *et al.* The functional diversity of retinal ganglion cells in the mouse. *Nature* **529**, 345–350  
574 (2016).
- 575 14. Hampson, K. M. *et al.* Adaptive optics for high-resolution imaging. *Nat. Rev. Methods Prim.* **1**, 68  
576 (2021).
- 577 15. Ji, N. Adaptive optical fluorescence microscopy. *Nat. Methods* **14**, 374–380 (2017).
- 578 16. Rodríguez, C. & Ji, N. Adaptive optical microscopy for neurobiology. *Curr. Opin. Neurobiol.* **50**,  
579 83–91 (2018).
- 580 17. Liang, J., Williams, D. R. & Miller, D. T. Supernormal vision and high-resolution retinal imaging  
581 through adaptive optics. *J. Opt. Soc. Am. A* **14**, 2884 (1997).
- 582 18. Akyol, E., Hagag, A. M., Sivaprasad, S. & Lotery, A. J. Adaptive optics: principles and applications  
583 in ophthalmology. *Eye* **35**, 244–264 (2021).
- 584 19. Palczewska, G. *et al.* Noninvasive two-photon microscopy imaging of mouse retina and retinal



- 585 pigment epithelium through the pupil of the eye. *Nat. Med.* **20**, 785–789 (2014).
- 586 20. Biss, D. P. *et al.* In vivo fluorescent imaging of the mouse retina using adaptive optics. *Opt. Lett.* **32**,  
587 659 (2007).
- 588 21. Alt, C., Biss, D. P., Tajouri, N., Jakobs, T. C. & Lin, C. P. An adaptive-optics scanning laser  
589 ophthalmoscope for imaging murine retinal microstructure. in *Proc.SPIE* vol. 7550 755019 (2010).
- 590 22. Geng, Y. *et al.* Adaptive optics retinal imaging in the living mouse eye. *Biomed. Opt. Express* **3**, 715  
591 (2012).
- 592 23. Sharma, R. *et al.* In vivo two-photon imaging of the mouse retina. *Biomed. Opt. Express* **4**, 1285  
593 (2013).
- 594 24. Wahl, D. J., Jian, Y., Bonora, S., Zawadzki, R. J. & Sarunic, M. V. Wavefront sensorless adaptive  
595 optics fluorescence biomicroscope for in vivo retinal imaging in mice. *Biomed. Opt. Express* **7**, 1  
596 (2016).
- 597 25. Wahl, D. J. *et al.* Adaptive optics in the mouse eye: wavefront sensing based vs image-guided  
598 aberration correction. *Biomed. Opt. Express* **10**, 4757 (2019).
- 599 26. Qin, Z. *et al.* Adaptive optics two-photon microscopy enables near-diffraction-limited and functional  
600 retinal imaging in vivo. *Light Sci. Appl.* **9**, 79 (2020).
- 601 27. Li, Z. *et al.* Fast widefield imaging of neuronal structure and function with optical sectioning in vivo.  
602 *Sci. Adv.* **6**, eaaz3870 (2020).
- 603 28. Grulkowski, I. *et al.* Swept source optical coherence tomography and tunable lens technology for  
604 comprehensive imaging and biometry of the whole eye. *Optica* **5**, 52 (2018).
- 605 29. Jian, Y., Zawadzki, R. J. & Sarunic, M. V. Adaptive optics optical coherence tomography for in vivo  
606 mouse retinal imaging. *J. Biomed. Opt.* **18**, 056007 (2013).
- 607 30. McNabb, R. P. *et al.* Wide-field whole eye OCT system with demonstration of quantitative retinal  
608 curvature estimation. *Biomed. Opt. Express* **10**, 338 (2019).
- 609 31. Wang, K. *et al.* Rapid adaptive optical recovery of optimal resolution over large volumes. *Nat.*  
610 *Methods* **11**, 625–628 (2014).
- 611 32. Wang, K. *et al.* Direct wavefront sensing for high-resolution in vivo imaging in scattering tissue.  
612 *Nat. Commun.* **6**, 7276 (2015).
- 613 33. Panagopoulou, S. I. & Neal, D. R. Zonal matrix iterative method for wavefront reconstruction from  
614 gradient measurements. *J Refract Surg* **21**, S563–S569 (2005).
- 615 34. Feng, G. *et al.* Imaging Neuronal Subsets in Transgenic Mice Expressing Multiple Spectral Variants  
616 of GFP. *Neuron* **28**, 41–51 (2000).
- 617 35. Geng, Y. *et al.* Optical properties of the mouse eye. *Biomed. Opt. Express* **2**, 717 (2011).
- 618 36. Patton, N. *et al.* Retinal vascular image analysis as a potential screening tool for cerebrovascular  
619 disease: A rationale based on homology between cerebral and retinal microvasculatures. *J. Anat.*  
620 **206**, 319–348 (2005).
- 621 37. Frost, S. *et al.* Retinal vascular biomarkers for early detection and monitoring of Alzheimer’s  
622 disease. *Transl. Psychiatry* **3**, (2013).

- 623 38. Ikram, M. K. *et al.* Retinal vascular caliber as a biomarker for diabetes microvascular complications.  
624 *Diabetes Care* **36**, 750–759 (2013).
- 625 39. Liew, G., Wang, J. J., Mitchell, P. & Wong, T. Y. Retinal vascular imaging: a new tool in  
626 microvascular disease research. *Circ. Cardiovasc. Imaging* **1**, 156–161 (2008).
- 627 40. Bar-Noam, A. S., Farah, N. & Shoham, S. Correction-free remotely scanned two-photon in vivo  
628 mouse retinal imaging. *Light Sci. Appl.* **5**, (2016).
- 629 41. Wang, Z., McCracken, S. & Williams, P. R. Transpupillary two-photon in vivo imaging of the  
630 mouse retina. *J. Vis. Exp.* **2021**, 1–23 (2021).
- 631 42. Campbell, M. C. W. & Hughes, A. An analytic, gradient index schematic lens and eye for the rat  
632 which predicts aberrations for finite pupils. *Vision Res.* **21**, 1129–1148 (1981).
- 633 43. Remtulla, S. & Hallett, P. E. A schematic eye for the mouse, and comparisons with the rat. *Vision*  
634 *Res.* **25**, 21–31 (1985).
- 635 44. Wang, C. & Ji, N. Pupil-segmentation-based adaptive optical correction of a high-numerical-aperture  
636 gradient refractive index lens for two-photon fluorescence endoscopy. *Opt. Lett.* **37**, 2001–2003  
637 (2012).
- 638 45. Wang, C. & Ji, N. Characterization and improvement of three-dimensional imaging performance of  
639 GRIN-lens-based two-photon fluorescence endomicroscopes with adaptive optics. *Opt. Express* **21**,  
640 27142–27154 (2013).
- 641 46. Hoon, M., Okawa, H., Della Santina, L. & Wong, R. O. L. Functional architecture of the retina:  
642 Development and disease. *Prog. Retin. Eye Res.* **42**, 44–84 (2014).
- 643 47. Ji, N., Sato, T. R. & Betzig, E. Characterization and adaptive optical correction of aberrations during  
644 in vivo imaging in the mouse cortex. *Proc. Natl. Acad. Sci.* **109**, 22–27 (2012).
- 645 48. Wang, C. *et al.* Multiplexed aberration measurement for deep tissue imaging in vivo. *Nat. Methods*  
646 **11**, 1037–1040 (2014).
- 647 49. Sun, W., Tan, Z., Mensh, B. D. & Ji, N. Thalamus provides layer 4 of primary visual cortex with  
648 orientation- and direction-tuned inputs. *Nat. Neurosci.* **19**, 308–315 (2016).
- 649 50. Yannuzzi, L. A. *et al.* Retinal angiomatous proliferation in age-related macular degeneration. *Retina*  
650 **21**, 416–34 (2001).
- 651 51. Heckenlively, J. R. *et al.* Mouse model of subretinal neovascularization with choroidal anastomosis.  
652 *Retina* **23**, 518–522 (2003).
- 653 52. Hu, W. *et al.* Expression of VLDLR in the retina and evolution of subretinal neovascularization in  
654 the knockout mouse model's retinal angiomatous proliferation. *Investig. Ophthalmology Vis. Sci.* **49**,  
655 407 (2008).
- 656 53. Li, C. *et al.* Biochemical Alterations in the Retinas of Very Low-Density Lipoprotein Receptor  
657 Knockout Mice. *Arch Ophthalmol.* **125**, (2007).
- 658 54. Xia, C., Lu, E., Zeng, J. & Gong, X. Deletion of LRP5 in VLDLR knockout mice inhibits retinal  
659 neovascularization. *PLoS One* **8**, e75186 (2013).
- 660 55. Chen, T.-W. *et al.* Ultrasensitive fluorescent proteins for imaging neuronal activity. *Nature* **499**,  
661 295–300 (2013).

- 662 56. Chang, B. *et al.* Retinal degeneration mutants in the mouse. *Vision Res.* **42**, 517–525 (2002).
- 663 57. Sekirnjak, C. *et al.* Changes in physiological properties of rat ganglion cells during retinal  
664 degeneration. *J. Neurophysiol.* **105**, 2560–2571 (2011).
- 665 58. Teliás, M. *et al.* Retinoic Acid Induces Hyperactivity, and Blocking Its Receptor Unmasks Light  
666 Responses and Augments Vision in Retinal Degeneration. *Neuron* **102**, 574–586.e5 (2019).
- 667 59. Teliás, M. *et al.* Retinoic acid inhibitors mitigate vision loss in a mouse model of retinal  
668 degeneration. *Sci. Adv.* **8**, 1–18 (2022).
- 669 60. Cao, K. J. *et al.* Cyclodextrin-Assisted Delivery of Azobenzene Photoswitches for Uniform and  
670 Long-Term Restoration of Light Responses in Degenerated Retinas of Blind Mice. *Adv. Ther.* **4**,  
671 (2021).
- 672 61. Liu, X. *et al.* Effect of contact lens on optical coherence tomography imaging of rodent retina. *Curr.*  
673 *Eye Res.* **38**, 1235–1240 (2013).
- 674 62. Ikeda, W., Nakatani, T. & Uemura, A. Cataract-preventing contact lens for in vivo imaging of mouse  
675 retina. *Biotechniques* **65**, 101–104 (2018).
- 676 63. Zhang, Q., Pan, D. & Ji, N. High-resolution in vivo optical-sectioning widefield microendoscopy.  
677 *Optica* **7**, 1287 (2020).
- 678 64. Jia, Y. *et al.* Quantitative optical coherence tomography angiography of vascular abnormalities in the  
679 living human eye. *Proc. Natl. Acad. Sci.* **112**, E2395–E2402 (2015).
- 680 65. Hormel, T. T. *et al.* Plexus-specific retinal vascular anatomy and pathologies as seen by projection-  
681 resolved optical coherence tomographic angiography. *Prog. Retin. Eye Res.* **80**, 100878 (2021).
- 682 66. Prahst, C. *et al.* Mouse retinal cell behaviour in space and time using light sheet fluorescence  
683 microscopy. *Elife* **9**, 1–29 (2020).
- 684 67. Sulai, Y. N. & Dubra, A. Non-common path aberration correction in an adaptive optics scanning  
685 ophthalmoscope. *Biomed. Opt. Express* **5**, 3059 (2014).
- 686 68. Booth, M. J. Adaptive optical microscopy: the ongoing quest for a perfect image. *Light Sci. Appl.* **3**,  
687 e165 (2014).
- 688 69. Schindelin, J. *et al.* Fiji: an open-source platform for biological-image analysis. **9**, 676–682 (2012).
- 689

690

691

## Supplementary Materials for

692

### **Retinal microvascular and neuronal pathologies probed *in vivo* by adaptive**

693

### **optical two-photon fluorescence microscopy**

694

695

*Qinrong Zhang, Yuhan Yang, Kevin J. Cao, Wei Chen, Santosh Paidi, Chun-Hong Xia, Richard H. Kramer, Xiaohua*

696

*Gong, Na Ji\**

697

\*Corresponding author. Email: [jina@berkeley.edu](mailto:jina@berkeley.edu)

698

699

#### **This file includes:**

700

Fig. S1. Characterization of aberrations introduced by ETL and alignment.

701

Fig. S2. Contact lens and eye gel application improve image and wavefront sensing quality.

702

Fig. S3. *Ex vivo* 2PFM imaging of dissected VLDLR-KO/Sca1-GFP and WT/Sca1-GFP mouse retinas.

703

Fig. S4. *In vivo* AO-2PFM imaging of Evans Blue (EB) leakage in healthy retina.

704

Fig. S5. *Ex vivo* multielectrode array (MEA) recordings of Lidocaine-modified RGC hyperactivity in *rd1*-Thy1-

705

GCaMP6s mouse retina.

706

Fig. S6. Zernike decompositions and corrective wavefronts for all experiments.

707

Table S1. Experimental settings for all experiments.

708 **Other Supplementary Materials for this manuscript include the following:**

709 Supplementary Movie 1

710 *In vivo* 2-photon image stacks of retinal vasculature in a wildtype mouse measured without and with AO performed at  
711 different locations in the field of view (red asterisks). Same data as shown in Fig. 2F. Image volume:  $580 \times 580 \times 110$   
712  $\mu\text{m}^3$ ; Z step: 3.26  $\mu\text{m}$ .

713 Supplementary Movie 2

714 *In vivo* 2-photon image stacks of retinal neurons in a Thy1-YFP-16 mouse measured without and with AO. Same data  
715 as shown in Fig. 3A,B,E. Image volume:  $580 \times 580 \times 80 \mu\text{m}^3 / 193 \times 193 \times 50 \mu\text{m}^3$ ; Z step: 1.63 / 0.98  $\mu\text{m}$ .

716 Supplementary Movie 3

717 *In vivo* 2-photon image stacks of abnormal retinal capillaries in a VLDLR-KO/Sca1-GFP mouse measured without and  
718 with AO. Same data as shown in Fig. 5A. Image volume:  $48 \times 48 \times 65 \mu\text{m}^3$ ; Z step: 3.26  $\mu\text{m}$ .

719 Supplementary Movie 4

720 *Ex vivo* 2-photon image stacks of abnormal capillaries in dissected VLDLR-KO/Sca1-GFP mouse retinas. Same data  
721 as shown in Fig. S3A,C. Image volume:  $1380 \times 1380 \times 82 \mu\text{m}^3 / 78 \times 78 \times 82 \mu\text{m}^3$ ; Z step: 0.5  $\mu\text{m}$ .

722 Supplementary Movie 5

723 *Ex vivo* 2-photon image stacks of normal capillaries in dissected WT/Sca1-GFP mouse retinas. Same data as shown in  
724 Fig. S3B,D. Image volume:  $1380 \times 1380 \times 71 \mu\text{m}^3 / 78 \times 78 \times 71 \mu\text{m}^3$ ; Z step: 0.5  $\mu\text{m}$ .

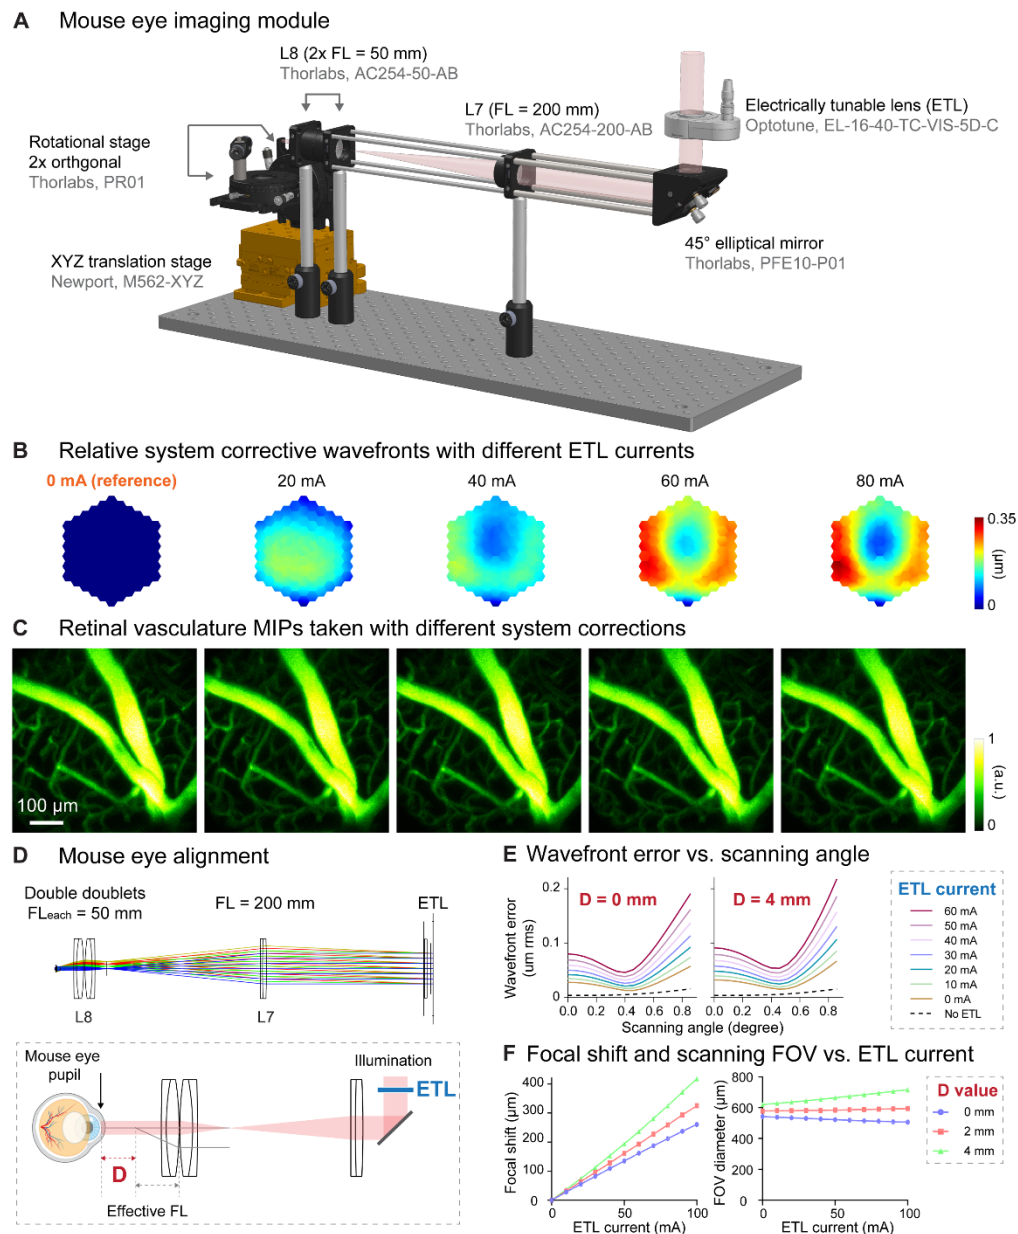

725

726 **Figure S1. Characterization of aberrations introduced by ETL and alignment.** (A) 3D rendering of the eye imaging  
 727 module. (B) Additional corrective wavefronts for system aberrations measured with 0, 20, 40, 60, and 80 mA ETL currents,  
 728 relative to the corrective wavefront measured with 0 ETL current. (C) MIPs of dye-injected retinal vasculature image stacks  
 729 ( $550 \times 550 \times 127 \mu\text{m}^3$ ) measured with corresponding system corrections in (B). (D) Top: Zemax ray tracing of the eye  
 730 imaging module. Bottom: illustration of mouse eye alignment (not to scale). D: distance between the mouse eye pupil and  
 731 L8 focal plane. (E) Wavefront errors versus scanning angle (at the ETL) for different ETL currents with the mouse eye  
 732 placed at  $D = 0 \text{ mm}$  and  $D = 4 \text{ mm}$ , respectively, obtained by ray tracing. (F) Relative focal shift and imaging FOV versus  
 733 ETL current at different D values, obtained by ray tracing.





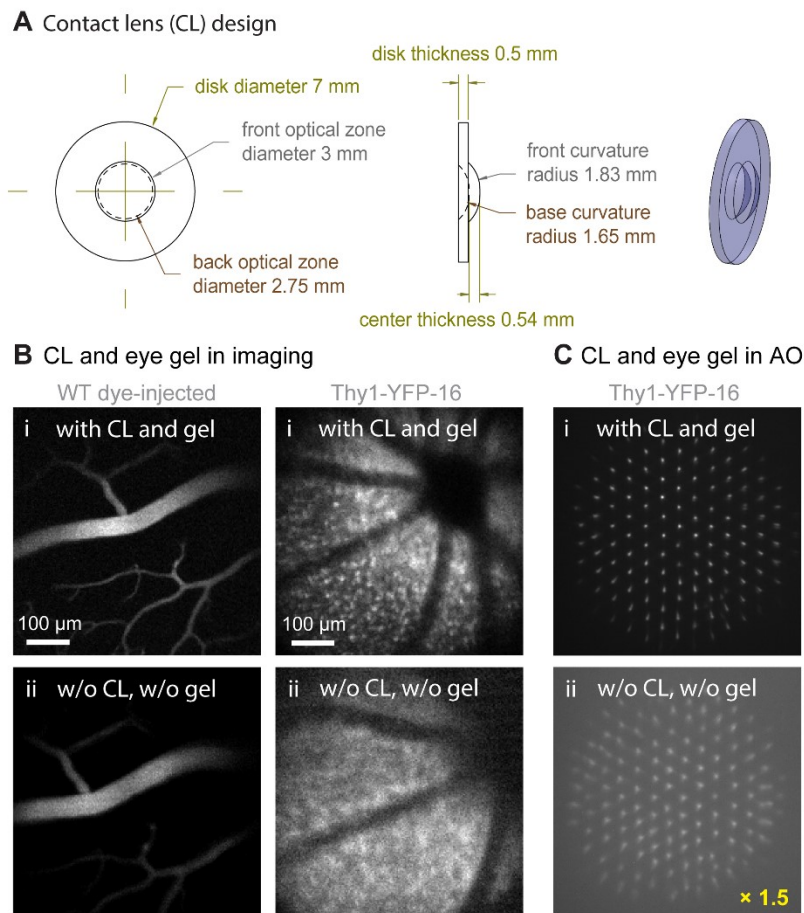

735

736 **Figure S2. Contact lens and eye gel application improve image and wavefront sensing quality.** (A) Design of the  
737 customized contact lens (CL). (B) 2PFM single-plane images of (left) retinal vasculature and (right) retinal cells acquired (i)  
738 with CL and eye gel and (ii) without CL or eye gel. All images taken with system aberration correction and normalized to  
739 (i). WT: wildtype. (C) Shack-Hartmann (SH) sensor images acquired from the Thy1-YFP-16 mouse retina in (B), normalized  
740 to SH image in (i). Brightness of SH image in (ii) artificially increased by 1.5× for better visualization.

741

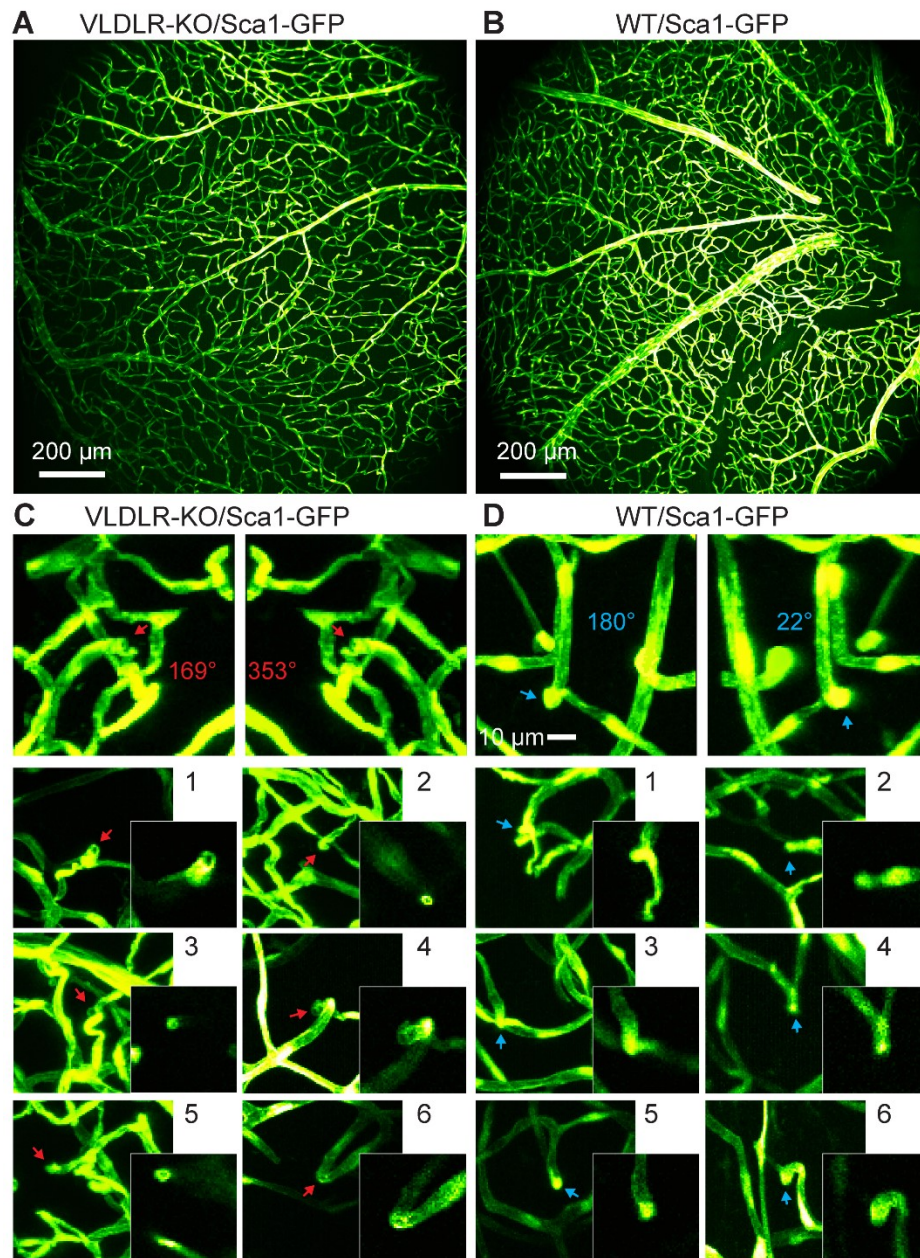

742

743 **Figure S3. Ex vivo 2PFM imaging of dissected VLDLR-KO/Sca1-GFP and WT/Sca1-GFP mouse retinas. (A,B) Ex**  
744  **vivo MIPs of image stacks from (A) VLDLR-KO/Sca1-GFP ( $1380 \times 1380 \times 82 \mu\text{m}^3$ ) and (B) WT/Sca1-GFP ( $1380 \times 1380$**   
745  **$\times 71 \mu\text{m}^3$ ) mouse retinas. (C) Top: 3D projected view of an example capillary lesion (red arrow) displayed at viewing angles**  
746  **of  $169^\circ$  and  $353^\circ$ , respectively. Bottom: MIPs of 6 more FOVs showing capillary disruptions (red arrows). Insets: single-**  
747  **plane zoomed-in images. (D) Top: 3D projected view of an example normal capillary (blue arrow) displayed at viewing**  
748  **angles of  $180^\circ$  and  $22^\circ$ , respectively. Bottom: MIPs of 6 more FOVs showing normal capillary structures (blue arrows).**  
749  **Insets: single-plane zoomed-in images. Image contrast was adjusted individually for better visualization.**

750

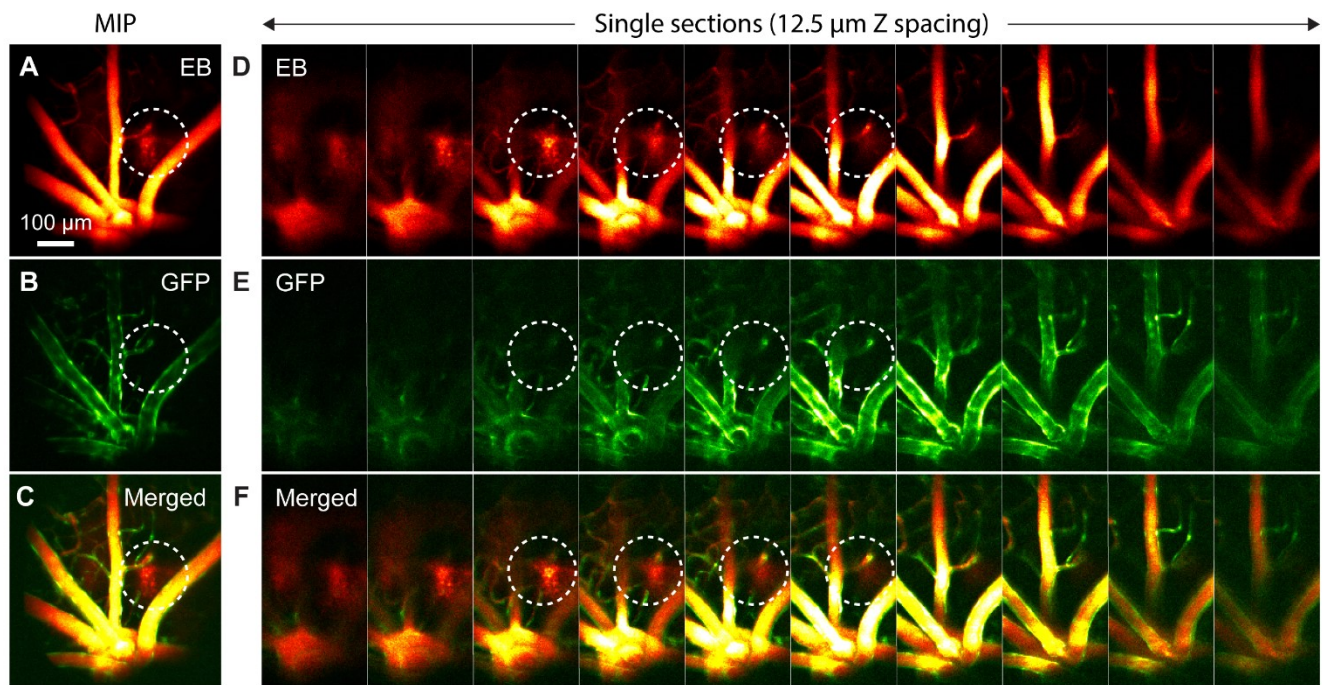

751

752 **Figure S4. *In vivo* AO-2PFM imaging of Evans Blue (EB) leakage in healthy retina. (A-C) MIPs of image stacks of**

753 **( $580 \times 580 \times 130 \mu\text{m}^3$ ) WT/Sca1-GFP retina measured in the (A) near-infrared EB and (B) green GFP channels, and (C)**

754 **merged images. (D-F) Single-plane images from (A-C) with  $12.5 \mu\text{m}$  Z step. White dashed circles: EB leakage areas.**

755



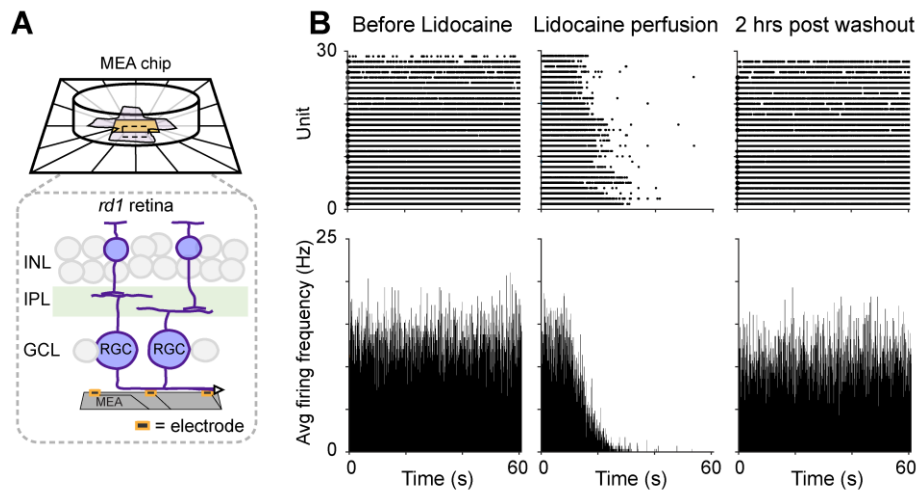

756

757 **Figure S5. Ex vivo multielectrode array (MEA) recordings of Lidocaine-modified RGC hyperactivity in *rd1*-Thy1-**  
758 **GCaMP6s mouse retina. (A)** MEA setup for RGC spontaneous spike activity recording. Inset: illustration of retina  
759 placement relative to MEA. **(B)** Raster and average firing frequency plots of RGCs in dissected *rd1* mouse retina (left) before  
760 and (middle) right after Lidocaine bath perfusion, and (right) 2 hours post washout, respectively.

761

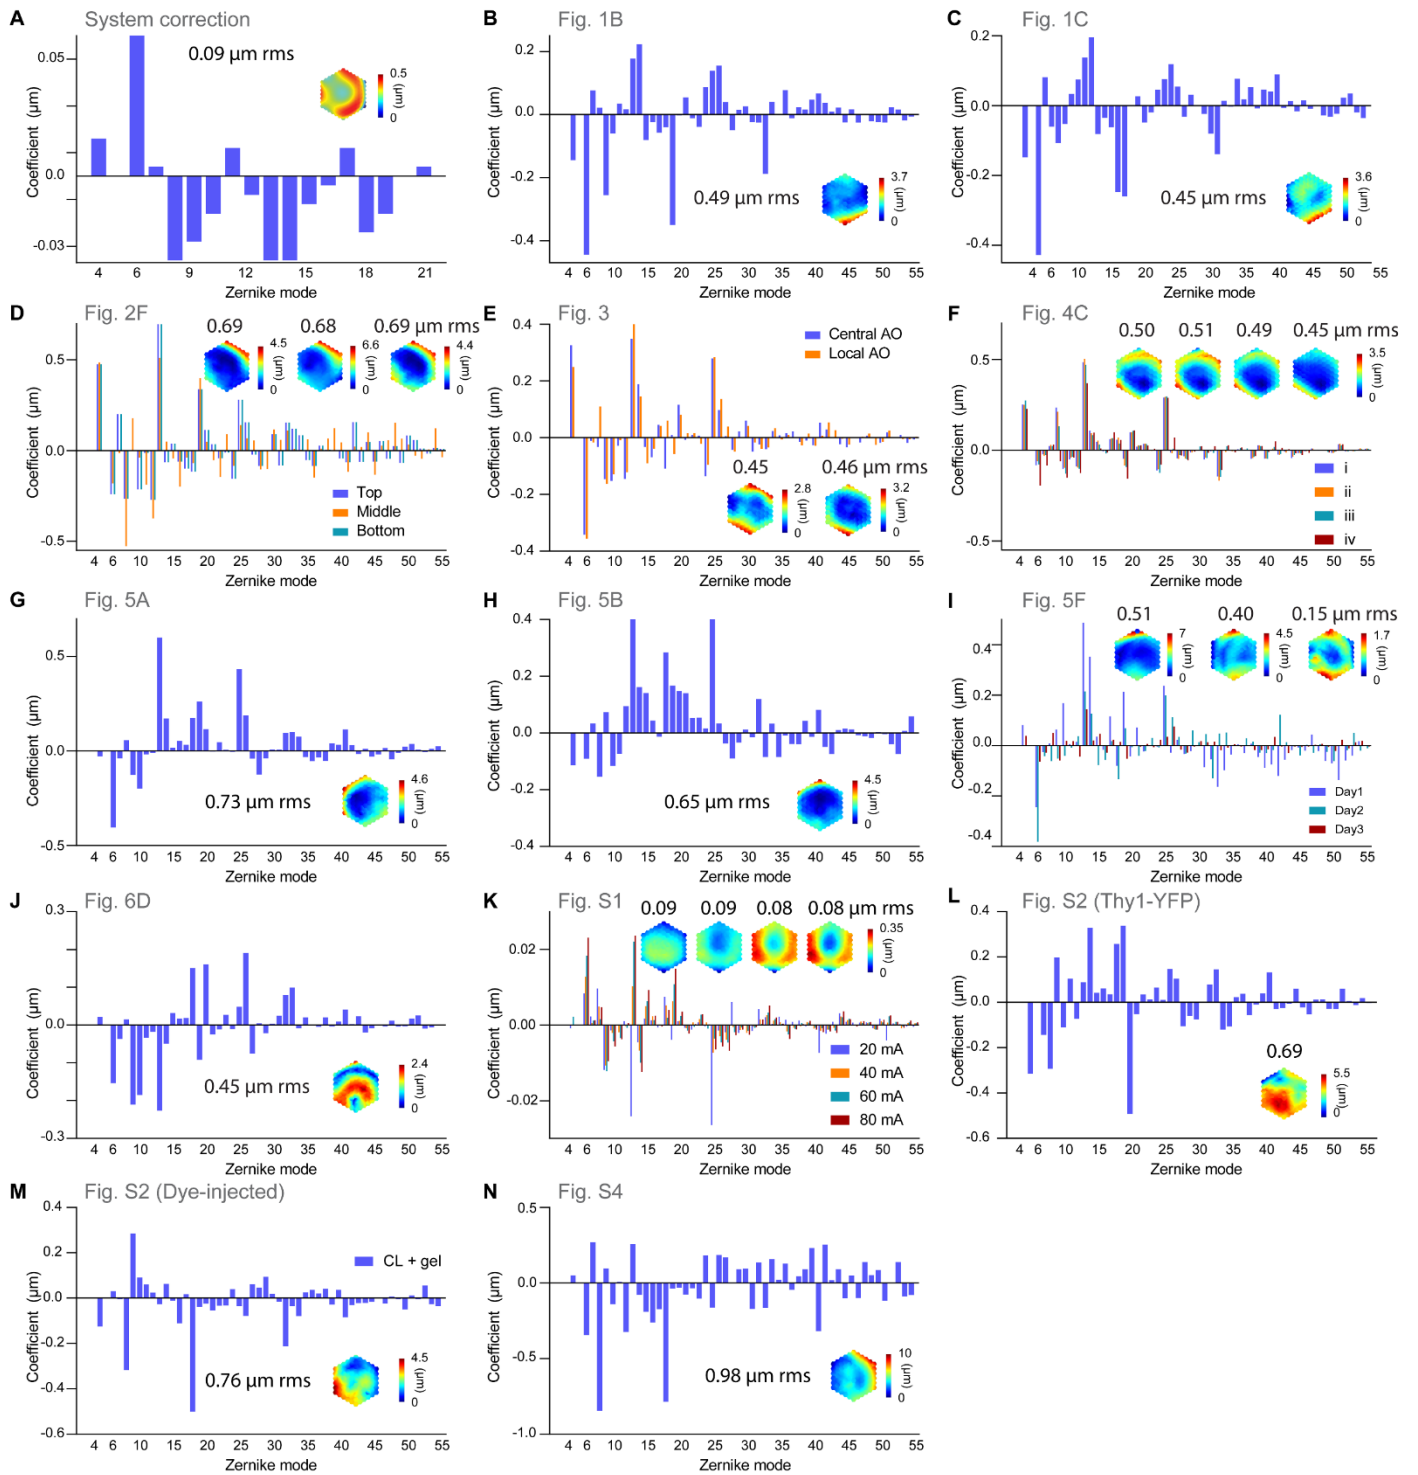

762

763 **Figure S6. Zernike decompositions and corrective wavefronts for all experiments.** All corrective wavefronts and  
 764 Zernike decompositions were calculated excluding piston, tip, tilt, and defocus.

765

766



767 **Table S1. Experiment settings for all experiments.**

| Parameters                              | Fig. 1                                                          |                                |                  |                   | Fig. 2                         |                        |                   | Fig. 3           |                                         |                     |
|-----------------------------------------|-----------------------------------------------------------------|--------------------------------|------------------|-------------------|--------------------------------|------------------------|-------------------|------------------|-----------------------------------------|---------------------|
| Panel                                   | B                                                               | C                              |                  |                   | A-B, F                         |                        |                   | A-B              | E-F                                     |                     |
| Modality                                | <i>In vivo</i> 2PFM                                             |                                |                  |                   | <i>In vivo</i> 2PFM            |                        |                   |                  |                                         |                     |
| Mouse line                              | Thy1-GFP Line-M                                                 |                                |                  |                   | Wildtype                       |                        |                   | Thy1-YFP Line-16 |                                         |                     |
| Procedure                               | Retro-orbital injection (r.o.) of Evans Blue for AO measurement |                                |                  |                   | R.o. injection of FITC-dextran |                        |                   | /                |                                         |                     |
| Illum. power (mW)                       | 45                                                              |                                |                  |                   | 5.8                            |                        |                   | 12               | 12                                      |                     |
| FOV( $\mu\text{m} \times \mu\text{m}$ ) | 72 x 72                                                         | 132 x 97                       |                  |                   | 580 x 580                      |                        |                   | 580 x 580        | 193 x 193                               |                     |
| Pixel size ( $\mu\text{m}$ )            | 0.36                                                            | 0.97                           |                  |                   | 2.9                            |                        |                   | 1.45             | 0.97                                    |                     |
| Stack thickness ( $\mu\text{m}$ )       | 25                                                              | 32                             |                  |                   | 128 (A-B); 110 (F)             |                        |                   | 80               | INL/GCL: 4/9/7.8<br>o.w. single section |                     |
| Axial step ( $\mu\text{m}$ )            | 0.65                                                            | 0.65                           |                  |                   | 1.63 (A-B); 3.26 (F)           |                        |                   | 1.63             | 0.98                                    |                     |
| Parameters                              | Fig. 4                                                          |                                |                  |                   | Fig. 5                         |                        |                   |                  |                                         |                     |
| Panel                                   | C                                                               | A                              |                  | B                 |                                | C                      |                   |                  | D                                       |                     |
|                                         |                                                                 | left                           | right            | left              | right                          | Full image             | Inset             |                  |                                         |                     |
| Modality                                | <i>In vivo</i> 2PFM                                             | <i>In vivo</i> 2PFM            |                  |                   |                                | <i>In vivo</i> 2PFM    |                   |                  |                                         |                     |
| Mouse line                              | Thy1-YFP Line-16                                                | VLDLR-KO/Sca1-GFP              |                  | Wildtype/Sca1-GFP |                                | VLDLR-KO/Sca1-GFP      |                   |                  |                                         |                     |
| Procedure                               | /                                                               | /                              |                  |                   |                                | R.o. injection of FITC |                   |                  |                                         |                     |
| Illum. power (mW)                       | 18                                                              | 5.8                            |                  | 23                |                                | 15                     |                   |                  | 10                                      |                     |
| FOV( $\mu\text{m} \times \mu\text{m}$ ) | 580 x 580                                                       | 580 x 580                      | 97 x 174         | 520 x 520         | 124 x 193                      | 580 x 580              | 58 x 58           | 580 x 580        |                                         |                     |
| Pixel size ( $\mu\text{m}$ )            | 1.45                                                            | 2.9                            | 0.97             | 2.9               | 0.76                           | 2.9                    | 0.97              |                  | 2.9                                     |                     |
| Stack thickness ( $\mu\text{m}$ )       | 94                                                              | 94                             | 72               | 120               | 78                             | /                      | 8.2               |                  | 163                                     |                     |
| Axial step ( $\mu\text{m}$ )            | 3.26                                                            | 3.26                           |                  |                   | /                              | 1.63                   |                   | 1.63             |                                         |                     |
| Parameters                              | Fig. 5                                                          |                                |                  |                   |                                | Fig. 6                 |                   |                  |                                         |                     |
| Panel                                   | E                                                               | F                              |                  |                   | G                              |                        |                   | C                | D                                       |                     |
|                                         |                                                                 | Full image                     |                  | Zoom-in           |                                | Top                    | Middle            | Bottom           |                                         |                     |
| Modality                                | <i>In vivo</i> 2PFM                                             |                                |                  |                   |                                | <i>In vivo</i> 2PFM    |                   |                  | <i>Ex vivo</i> 2PFM                     | <i>In vivo</i> 2PFM |
| Mouse line                              | VLDLR-KO/Sca1-GFP                                               |                                |                  |                   |                                | VLDLR-KO/Sca1-GFP      |                   |                  | rd1                                     | rd1                 |
| Procedure                               | R.o. injection of FITC                                          | R.o. injection of Evans Blue   |                  |                   | /                              |                        |                   | /                | R.o. injection of Evans Blue            |                     |
| Illum. power (mW)                       | 15                                                              | 15-25                          |                  |                   | 20                             | 27                     |                   | 5                | 25                                      |                     |
| FOV( $\mu\text{m} \times \mu\text{m}$ ) | 580 x 580                                                       | 580 x 580                      | 63.5 x 127       |                   | 58 x 58                        | 102 x 127              | 56 x 56           | 512 x 512        | 290 x 290                               |                     |
| Pixel size ( $\mu\text{m}$ )            | 2.9                                                             | 2.9                            | 0.72             |                   | 0.29                           | 0.97                   |                   | 2                | 1.45                                    |                     |
| Stack thickness ( $\mu\text{m}$ )       | 150                                                             | 166 (NIR)                      | /                |                   | /                              | /                      |                   | /                | /                                       |                     |
| Axial step ( $\mu\text{m}$ )            | 1.63                                                            | 1.63                           |                  |                   | /                              | /                      |                   | /                | /                                       |                     |
| Parameters                              | Fig. S1                                                         |                                | Fig. S2          |                   | Fig. S3                        |                        |                   |                  |                                         |                     |
| Panel                                   | B                                                               | A                              | B                |                   | A                              | C                      | B                 | D                |                                         |                     |
| Modality                                | <i>In vivo</i> 2PFM                                             |                                |                  |                   | <i>Ex vivo</i> 2PFM            |                        |                   |                  |                                         |                     |
| Mouse line                              | Wildtype                                                        | Wildtype                       | Thy1-YFP Line-16 |                   | VLDLR-KO/Sca1-GFP              |                        | Wildtype/Sca1-GFP |                  |                                         |                     |
| Procedure                               | R.o. injection of FITC-dextran                                  | R.o. injection of FITC-dextran | /                |                   | /                              |                        |                   |                  |                                         |                     |
| Illum. power (mW)                       | 12                                                              | 12                             | 18               |                   | 12                             | 12                     | 18                | 18               |                                         |                     |
| FOV( $\mu\text{m} \times \mu\text{m}$ ) | 550 x 550                                                       | 580 x 580                      | 580 x 580        |                   | 1380 x 1380                    | 78 x 78                | 1380 x 1380       | 78 x 78          |                                         |                     |
| Pixel size ( $\mu\text{m}$ )            | 2.9                                                             | 2.9                            | 2.9              |                   | 0.675                          | 0.675                  | 0.675             | 0.675            |                                         |                     |
| Stack thickness ( $\mu\text{m}$ )       | 127                                                             | /                              | /                |                   | 82                             | 82                     | 71                | 71               |                                         |                     |
| Axial step ( $\mu\text{m}$ )            | 3.26                                                            | /                              | /                |                   | 0.5                            | 0.5                    | 0.5               | 0.5              |                                         |                     |
| Parameters                              | Fig. S4                                                         |                                |                  |                   |                                |                        |                   |                  |                                         |                     |
| Panel                                   | A-C                                                             | D-E                            |                  |                   |                                |                        |                   |                  |                                         |                     |
| Modality                                | <i>In vivo</i> 2PFM                                             |                                |                  |                   |                                |                        |                   |                  |                                         |                     |
| Mouse line                              | Wildtype/Sca1-GFP                                               |                                |                  |                   |                                |                        |                   |                  |                                         |                     |
| Procedure                               | R.o. injection of Evans Blue                                    |                                |                  |                   |                                |                        |                   |                  |                                         |                     |
| Illum. power (mW)                       | 20                                                              | 20                             |                  |                   |                                |                        |                   |                  |                                         |                     |
| FOV( $\mu\text{m} \times \mu\text{m}$ ) | 580 x 580                                                       | 580 x 290                      |                  |                   |                                |                        |                   |                  |                                         |                     |
| Pixel size ( $\mu\text{m}$ )            | 2.9                                                             | 2.9                            |                  |                   |                                |                        |                   |                  |                                         |                     |
| Stack thickness ( $\mu\text{m}$ )       | 130                                                             | 130                            |                  |                   |                                |                        |                   |                  |                                         |                     |
| Axial step ( $\mu\text{m}$ )            | 3.26                                                            | 3.26                           |                  |                   |                                |                        |                   |                  |                                         |                     |

768

769
